# Supplementary material for: Nosocomial outbreak of COVID-19 pneumonia in Wuhan, China
Source: PubMed Central journal article supplement — Eur Respir J. 2020 Jun 4;55(6):2000544. doi: 10.1183/13993003.00544-2020 (PMC7236818; doi:10.1183/13993003.00544-2020), 2020-06-04
Supplement: ERJ-00544-2020.Shareable.pdf [file ERJ-00544-2020.Shareable.pdf]

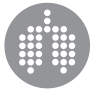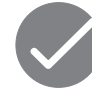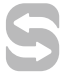

SHAREABLE PDF

# Nosocomial outbreak of COVID-19 pneumonia in Wuhan, China

Xiaorong Wang<sup>1,12</sup>, Qiong Zhou <sup>1,12</sup>, Yukun He<sup>2,12</sup>, Lingbo Liu<sup>3</sup>, Xinqian Ma<sup>2</sup>, Xiaoshan Wei<sup>1</sup>, Nanchuan Jiang<sup>4</sup>, Limei Liang<sup>1</sup>, Yali Zheng<sup>5</sup>, Ling Ma<sup>6</sup>, Yu Xu<sup>2</sup>, Dong Yang<sup>7</sup>, Jianchu Zhang<sup>1</sup>, Bohan Yang<sup>1</sup>, Ning Jiang<sup>2</sup>, Tao Deng<sup>8</sup>, Bingbing Zhai<sup>8</sup>, Yang Gao<sup>8</sup>, Wenxuan Liu<sup>8</sup>, Xinghua Bai<sup>8</sup>, Tao Pan<sup>8</sup>, Guoqing Wang<sup>8</sup>, Yujun Chang <sup>9,10</sup>, Zhi Zhang<sup>9,10</sup>, Huanzhong Shi <sup>11</sup>, Wan-Li Ma<sup>1,13</sup> and Zhancheng Gao<sup>2,13</sup>

**Affiliations:** <sup>1</sup>Dept of Respiratory and Critical Care Medicine, Union Hospital, Tongji Medical College, Huazhong University of Science and Technology, Wuhan, China. <sup>2</sup>Dept of Respiratory and Critical Care Medicine, Peking University People's Hospital, Beijing, China. <sup>3</sup>School of Urban Design, Wuhan University, Wuhan, China. <sup>4</sup>Dept of Radiology, Union Hospital, Tongji Medical College, Huazhong University of Science and Technology, Wuhan, China. <sup>5</sup>Dept of Respiratory, Critical Care, and Sleep Medicine, Xiang'an Hospital of Xiamen University, Xiamen, China. <sup>6</sup>Dept of Clinical Laboratory, Union Hospital, Tongji Medical College, Huazhong University of Science and Technology, Wuhan, China. <sup>7</sup>Dept of Anaesthesiology, Union Hospital, Tongji Medical College, Huazhong University of Science and Technology, Wuhan, China. <sup>8</sup>Beijing CapitalBio Medical Laboratory, Beijing, China. <sup>9</sup>National Engineering Research Center for Beijing Biochip Technology, Beijing, China. <sup>10</sup>CapitalBio Corporation, Beijing, China. <sup>11</sup>Dept of Respiratory and Critical Care Medicine, Beijing Chao-Yang Hospital, Capital Medical University, Beijing, China. <sup>12</sup>Equal contributors. <sup>13</sup>These authors are joint principal authors.

**Correspondence:** Zhancheng Gao, Dept of Respiratory and Critical Care Medicine, Peking University People's Hospital, Beijing 100044, China. E-mail: zcgao@bjmu.edu.cn

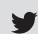

@ERSpublications

SARS-CoV-2 can be rapidly transmitted from person to person in nosocomial and social settings, despite patients having no symptoms <https://bit.ly/34BHtB5>

**Cite this article as:** Wang X, Zhou Q, He Y, *et al.* Nosocomial outbreak of COVID-19 pneumonia in Wuhan, China. *Eur Respir J* 2020; 55: 2000544 [<https://doi.org/10.1183/13993003.00544-2020>].

This single-page version can be shared freely online.

## ABSTRACT

**Background:** The novel coronavirus, severe acute respiratory syndrome coronavirus 2 (SARS-CoV-2), infected over 3300 healthcare workers in early 2020 in China. Little information is known about nosocomial infections of healthcare workers in the initial period. We analysed data from healthcare workers with nosocomial infections in Wuhan Union Hospital (Wuhan, China) and their family members.

**Methods:** We collected and analysed data on exposure history, illness timelines and epidemiological characteristics from 25 healthcare workers with laboratory-confirmed coronavirus disease 2019 (COVID-19) and two healthcare workers in whom COVID-19 was highly suspected, as well as 10 of their family members with COVID-19, between 5 January and 12 February 2020. The demographics and clinical features of the 35 laboratory-confirmed cases were investigated and viral RNA of 12 cases was sequenced and analysed.

**Results:** Nine clusters were found among the patients. All patients showed mild to moderate clinical manifestation and recovered without deterioration. The mean period of incubation was 4.5 days, the mean±SD clinical onset serial interval (COSI) was 5.2±3.2 days, and the median virus shedding time was 18.5 days. Complete genomic sequences of 12 different coronavirus strains demonstrated that the viral

structure, with small irrelevant mutations, was stable in the transmission chains and showed remarkable traits of infectious traceability.

**Conclusions:** SARS-CoV-2 can be rapidly transmitted from person to person, regardless of whether they have symptoms, in both hospital settings and social activities, based on the short period of incubation and COSI. The public health service should take practical measures to curb the spread, including isolation of cases, tracing close contacts, and containment of severe epidemic areas. Besides this, healthcare workers should be alert during the epidemic and self-quarantine if self-suspected of infection.
