# Supplementary material for: Nosocomial outbreak of COVID-19 pneumonia in Wuhan, China
Source: PubMed Central journal article supplement — Eur Respir J. 2020 Jun 4;55(6):2000544. doi: 10.1183/13993003.00544-2020 (PMC7236818; doi:10.1183/13993003.00544-2020), 2020-06-04
Supplement: ERJ-00544-2020.Supplement.pdf [file ERJ-00544-2020.Supplement.pdf]

## **Nosocomial Outbreak of 2019 Novel Coronavirus Pneumonia in Wuhan, China**

Author list: Xiaorong Wang<sup>1\*</sup>, M.D., Qiong Zhou<sup>1\*</sup>, M.D., Yukun He<sup>2\*</sup>, Ph.D., Lingbo Liu<sup>3</sup>, Ph.D., Xinqian Ma<sup>2</sup>, M.Sc. Xiaoshan Wei<sup>1</sup>, M.D., Nanchuan Jiang<sup>4</sup>, M.D., Limei Liang<sup>1</sup>, Ph.D., Yali Zheng<sup>5</sup>, Ph.D., Ling Ma<sup>6</sup>, M.D., Yu Xu<sup>2</sup>, M.D., Dong Yang<sup>7</sup>, M.D., Jianchu Zhang<sup>1</sup>, M.D., Bohan Yang<sup>1</sup>, M.Med., Ning Jiang<sup>2</sup>, M.D., Tao Deng<sup>8</sup>, M.S., Bingbing Zhai<sup>8</sup>, M.E., Yang Gao<sup>8</sup>, B.S., Wenxuan Liu<sup>8</sup>, B.S., Xinghua Bai<sup>8</sup>, M.S., Tao Pan<sup>8</sup>, M.S., Guoqing Wang<sup>8</sup>, M.S., Yujun Chang<sup>9,10</sup>, Ph.D., Zhi Zhang<sup>9,10</sup>, Ph.D., Huanzhong Shi<sup>11</sup>, M.D., Wan-Li Ma<sup>1†</sup>, M.D., and Zhancheng Gao<sup>2†</sup> M.D.

Running title: Nosocomial Outbreak of Novel Coronavirus Pneumonia

1. Department of Respiratory and Critical Care Medicine, Union Hospital, Tongji Medical College, Huazhong University of Science and Technology, Wuhan, 430022, China.
2. Department of Respiratory and Critical Care Medicine, Peking University People's hospital, Beijing, 100044, China.
3. School of Urban Design, Wuhan University, Wuhan, 430072, China.
4. Department of Radiology, Union Hospital, Tongji Medical College, Huazhong University of Science and Technology, Wuhan, 430022, China.
5. Department of Respiratory, Critical Care, and Sleep Medicine, Xiang'an Hospital of Xiamen University, Xiamen, 361101, China.
6. Department of Clinical Laboratory, Union Hospital, Tongji Medical College, Huazhong University of Science and Technology, Wuhan, 430022, China.
7. Department of Anaesthesiology, Union Hospital, Tongji Medical College, Huazhong University of Science and Technology, Wuhan, 430022, China.
8. Beijing CapitalBio Medical Laboratory, Beijing, 101111, China.
9. National Engineering Research Center for Beijing Biochip Technology, Beijing, 102206, China.
10. CapitalBio Corporation, Beijing, 102206, China.

11. Department of Respiratory and Critical Care Medicine, Beijing Chao-Yang Hospital, Capital Medical University, 8 Gongti Nanlu, Chao-Yang District, Beijing 100020, China.

\*Equal contributors

†Correspondence to:

Zhancheng Gao, M.D.

Department of Respiratory and Critical Care Medicine, Peking University People's hospital, Beijing, 100044, China.

e-mail: [zcgao@bjmu.edu.cn](mailto:zcgao@bjmu.edu.cn)

or Wan-Li Ma, M.D.

Department of Respiratory and Critical Care Medicine, Union Hospital, Tongji Medical College, Huazhong University of Science and Technology, Wuhan, 430022, China. e-

mail: [whmawl@hust.edu.cn](mailto:whmawl@hust.edu.cn)

**Contents of Supplements**

**Supplement 1 Detailed information of exposure history, the symptoms at onset of illness of 9 transmission chains and other sporadic cases as showed in figure 1A and 1B. ....4**

**Supplement 2 Difference between active consultation vs not-active consultation .5**

**Supplement 3 Details of isolation measures.....5**

**Supplementary 4 RNA extraction and real-time RT-PCR assay .....5**

**Supplementary Figures .....7**

**Supplementary Tables .....17**

**Reference .....43**

## **Supplement 1 Detailed information of exposure history, the symptoms at onset of illness of 9 transmission chains and other sporadic cases as showed in figure 1A and 1B**

We found two clusters in the Department of Neurosurgery.

Cluster 1: The first hospitalized man (index patient A) in the Department of Neurosurgery had a fever on the Jan 6, 2020. He was diagnosed as laboratory-confirmed COVID-19 on Jan 16 by Wuhan Center for Disease Control & Prevention. Nurse C who took care of him felt slight malaise on Jan 9, and developed slight dry cough two days later, but his chest roentgenography showed no abnormalities, and was confirmed as COVID-19 on Jan 18 until RT-PCR assays to test for the 2019-nCoV be available in hospital then. He was found to be co-infected with A/H1N1 influenza virus after admission. Nurse H took care of the patient A between Jan 9 and Jan 11, she developed symptoms on Jan 13, and was diagnosed on Jan 18. Nurse F was likely to contact with the patient under certain conditions.

Cluster 2: The second patient (index patient B) was admitted to the hospital on Jan 7. Nurse M, Q, O all had close contact with patient, which could be the reason of their infections with 2019-nCoV. Two confirmed patients with five HCWs in close contact with them, acting as a source of infection, spread the virus among the colleagues in the department through daily work and gathering activities. Nurse E wasn't exposed to them but went to a fever clinic without a mask on about Jan 8. At last, 12 HCWs in Department of Neurosurgery were laboratory confirmed COVID-19 cases. Nurse O as probable case had negative viral nucleic acid tests but had COVID-19-like symptoms and imaging findings (Figure S5). And another doctor Z as probable case presented the similar clinical manifestation except for negative viral assay. By far, expect Nurse F, all HCWs in Department of Neurosurgery were recovered and discharged.

We found seven family clusters among HCWs.

Cluster 3: Nurse U developed symptoms on Jan 17 with nasal congestion and rhinorrhea. She lives with her husband and her parents in law, and her parents are in another building but in the same neighborhood. They ate dinner together every night. Then her mother in law f and her mother i and grandmother j developed symptoms successively on Jan 19, Jan 28 and Jan 29, separately.

Cluster 4: Nurse P in Department of Neurology had no clear exposure to any relative patients, but she expressed symptoms of fever on the night of Jan 15, her husband c had fever successively on Jan 18.

Cluster 5: Nurse F developed mild symptoms on Jan 12, but she didn't pay much attention to it and attended Neurosurgery department gala. She lives in the same room with her husband g, her son is in another. Her husband developed symptoms on Jan 21, but her son was fine. Her colleague (doctor S) who had close contact with her on the gala developed symptoms on Jan 16 as well. She suffered severe diarrhea during hospitalization. Even the nucleic acid test of nasopharynx swabs has turned negative and lung CT images got better, the nucleic acid test of stool is still positive one month after onset.

Cluster 6: Nurse R developed symptom of sore throat on Jan 16, later her husband e developed symptoms on Jan 19 immediately.

Cluster 7: Nurse A who treated a child with infectious disease developed symptoms on Jan 5, her husband a and daughter b developed symptoms on Jan 7 and Jan 8. Both of them didn't take much attention until her husband's symptoms worsened with fever and chest tightness on Jan 13. Nurse A was diagnosed on Jan 18 with typical imaging findings of 2019-nCoV pneumonia.

Cluster 8: Nurse B developed symptoms of sore throat, nasal congestion, and intermittent low fever since Jan 8. She met her boyfriend d on Jan 15. Three days later, her boyfriend had headache, later was

diagnosed with 2019-nCoV infection.

Cluster 9: Doctor X was neurological physician who had no clear exposure history. She only had mild symptoms of the upper respiratory tract, and the CT images has no typical infection during hospitalization. Her mother h had cough and fever on Jan 24. Her father k developed myalgia and fever on Jan 26, they went to the hospital and were confirmed with 2019-nCoV infection. Doctor X was confirmed last.

Regarding to HCWs with COVID-19 in other departments in the same hospital, Doctor D who was mainly responsible for gastroscopy fell ill on Jan 11 and did not wear a mask at work. Nurse G in Department of Cardiology and Nurse I in Department of Cardiac Surgery had no clear exposure history but developed symptoms on Jan 12 and 14, 2020, respectively. Staff L in Finance Department had fever on Jan 14, 2020. Doctor T as the director of fever clinic was infected since exposing to many COVID-19 frequently. Nurse V in Department of Laboratory is responsible for the daily delivery clinical specimen of both inpatients and outpatients. Doctor Y in Department of Neurology get fever on Jan 22, who has been exposed to confirmed cases on Jan 19 and Jan 20, 2020.

## **Supplement 2 Difference between active consultation vs not-active consultation**

We compare the difference of clinical symptoms between patients who seek medical treatment actively and those who passively went to see the doctor. We found that mild symptoms are most likely to be ignored, such as nasal congestion and rhinorrhea, which could lead to further spread of the virus. In contrast, symptoms such as fever and poor appetite are more likely to attract people's attention.

## **Supplement 3 Details of isolation measures**

14 HCWs didn't have family members infected. Most of them wearing a mask came home or lived alone in a room. But among the 7(A, B, F, P, R, U, X) family clusters, the HCWs did not pay much attention at the early stage of illness and conduct self-isolation in time. Through investigation, we found that these families were not exposed to other suspected cases. Thus, there is a clear evidence of the transmission between the HCWs and their family members. So timely and effective isolation measures in the early stage of onset may greatly reduce the risk of disease transmission. In contrast, any kind of aggregation activities can greatly increase the likelihood of disease spreading.

## **Supplementary 4 RNA extraction and real-time RT-PCR assay**

Total RNA was extracted from nasopharynx swabs samples of patients suspected of having 2019-nCoV infection within 2 hours using the respiratory sample RNA isolation kit. In brief, 40  $\mu$ L of cell lysates were transferred into a collection tube followed by vortex for 10 seconds. After standing at room temperature for 10 minutes, the collection tube was centrifugated at 1000rpm/min for 5minutes. The suspension was used for real-time RT-PCR assay of 2019-nCoV RNA. Two target genes, including open reading frame1ab (ORF1ab) and nucleocapsid protein(N), were simultaneously amplified and tested during the real-time RT-PCR assay. Target 1 (ORF1ab): forward primer CCCTGTGGGTTTTACTTAA; reverse primer ACGATTGTGCATCAGCTGA. Target2 (N): forward primer GGGGAAGTCTCC TGCTAGAAT; reverse primer CAGACATTTTGCTCTCAAGCTG. RT-PCR assay was performed under the following conditions: incubation at 50 °C for 15 minutes and 95 °C for 2 minutes, 45 cycles of denaturation at 95°C for 3

seconds, then annealing, extending and collecting fluorescence signal at 55 °C for 30 seconds<sup>1</sup>. A cycle threshold value (Ct-value) less than 37 was defined as a positive test result, and a Ct-value of 40 or more was defined as a negative test. These diagnostic criteria were based on the recommendation by the National Institute for Viral Disease Control and Prevention (China)<sup>2</sup>. A medium load, defined as a Ct-value of 37 to less than 40, required confirmation by retesting.

## Supplementary Figures

**Figure S1 Comparison of amino acid sequence of Spike protein between 2019-nCoV from our 12 samples, Wuhan-Hu-1 (NC\_045512.2), bat-SL-CoVZC45 (MG772933.1) and SARS coronavirus isolate Tor2/FP1-10851 (JX163927.1)**

There is no obvious difference between different 2019-nCoVs. Compared with bat-SL-CoVZC45 and SARS coronavirus isolate Tor2/FP1-10851, 2019-nCoV has 4 insertion regions (257<sup>th</sup>-261<sup>th</sup>, 449<sup>th</sup>-454<sup>th</sup>, 479<sup>th</sup>-495<sup>th</sup>, 685<sup>th</sup>-690<sup>th</sup> site) and 3 insertion regions (74<sup>th</sup>-85<sup>th</sup>, 252<sup>th</sup>-259<sup>th</sup>, 685<sup>th</sup>-690<sup>th</sup> site) respectively.

```
SARS-CoV/Tor2/FP1-10851 : MEFVFLVLLPLVSSGSDLDTTFDDVQAPNYTQHSIRGVVYFDLIFRSDFIYITQDLFLPFYSNVICHTLN-----HTLGNPVTFFDGIYFFATEKSN : 96
bat-SL-CoVZC45 : MEFVFLVLLPLVSSGSDLDTTFDDVQAPNYTQHSIRGVVYFDLIFRSDFIYITQDLFLPFYSNVICHTLN-----HTLGNPVTFFDGIYFFATEKSN : 99
Wuhan-Hu-1 : MEFVFLVLLPLVSSGSDLDTTFDDVQAPNYTQHSIRGVVYFDLIFRSDFIYITQDLFLPFYSNVICHTLN-----HTLGNPVTFFDGIYFFATEKSN : 99
WHUHNCoV001 : MEFVFLVLLPLVSSGSDLDTTFDDVQAPNYTQHSIRGVVYFDLIFRSDFIYITQDLFLPFYSNVICHTLN-----HTLGNPVTFFDGIYFFATEKSN : 99
WHUHNCoV002 : MEFVFLVLLPLVSSGSDLDTTFDDVQAPNYTQHSIRGVVYFDLIFRSDFIYITQDLFLPFYSNVICHTLN-----HTLGNPVTFFDGIYFFATEKSN : 99
WHUHNCoV003 : MEFVFLVLLPLVSSGSDLDTTFDDVQAPNYTQHSIRGVVYFDLIFRSDFIYITQDLFLPFYSNVICHTLN-----HTLGNPVTFFDGIYFFATEKSN : 99
WHUHNCoV004 : MEFVFLVLLPLVSSGSDLDTTFDDVQAPNYTQHSIRGVVYFDLIFRSDFIYITQDLFLPFYSNVICHTLN-----HTLGNPVTFFDGIYFFATEKSN : 99
WHUHNCoV005 : MEFVFLVLLPLVSSGSDLDTTFDDVQAPNYTQHSIRGVVYFDLIFRSDFIYITQDLFLPFYSNVICHTLN-----HTLGNPVTFFDGIYFFATEKSN : 99
WHUHNCoV006 : MEFVFLVLLPLVSSGSDLDTTFDDVQAPNYTQHSIRGVVYFDLIFRSDFIYITQDLFLPFYSNVICHTLN-----HTLGNPVTFFDGIYFFATEKSN : 99
WHUHNCoV007 : MEFVFLVLLPLVSSGSDLDTTFDDVQAPNYTQHSIRGVVYFDLIFRSDFIYITQDLFLPFYSNVICHTLN-----HTLGNPVTFFDGIYFFATEKSN : 99
WHUHNCoV008 : MEFVFLVLLPLVSSGSDLDTTFDDVQAPNYTQHSIRGVVYFDLIFRSDFIYITQDLFLPFYSNVICHTLN-----HTLGNPVTFFDGIYFFATEKSN : 99
WHUHNCoV011 : MEFVFLVLLPLVSSGSDLDTTFDDVQAPNYTQHSIRGVVYFDLIFRSDFIYITQDLFLPFYSNVICHTLN-----HTLGNPVTFFDGIYFFATEKSN : 99
WHUHNCoV012 : MEFVFLVLLPLVSSGSDLDTTFDDVQAPNYTQHSIRGVVYFDLIFRSDFIYITQDLFLPFYSNVICHTLN-----HTLGNPVTFFDGIYFFATEKSN : 99
WHUHNCoV020 : MEFVFLVLLPLVSSGSDLDTTFDDVQAPNYTQHSIRGVVYFDLIFRSDFIYITQDLFLPFYSNVICHTLN-----HTLGNPVTFFDGIYFFATEKSN : 99
WHUHNCoV021 : MEFVFLVLLPLVSSGSDLDTTFDDVQAPNYTQHSIRGVVYFDLIFRSDFIYITQDLFLPFYSNVICHTLN-----HTLGNPVTFFDGIYFFATEKSN : 99
6F fl161lpLvss qCvnl1ttrtqlppaytnSftrGVVYFDK65R5svLhs3Qd1FLPF5SNV3w5ha6hvsngtkrfdNP66pFnDG6YFAStEKSN

SARS-CoV/Tor2/FP1-10851 : VVRGWVFGTTLDSKTQSLLIVNNAITNVVIKVCDFQPCNDPFLGVYYHKNNKSWMESEFRVYSSANNCTFEYVSQPLMDLLEGKQGNFKNLRFFVFKNIDGYFKI : 196
bat-SL-CoVZC45 : IIRGWVFGTTLDSKTQSLLIVNNAITNVVIKVCDFQPCNDPFLGVYYHKNNKSWMESEFRVYSSANNCTFEYVSQPLMDLLEGKQGNFKNLRFFVFKNIDGYFKI : 202
Wuhan-Hu-1 : IIRGWVFGTTLDSKTQSLLIVNNAITNVVIKVCDFQPCNDPFLGVYYHKNNKSWMESEFRVYSSANNCTFEYVSQPLMDLLEGKQGNFKNLRFFVFKNIDGYFKI : 203
WHUHNCoV001 : IIRGWVFGTTLDSKTQSLLIVNNAITNVVIKVCDFQPCNDPFLGVYYHKNNKSWMESEFRVYSSANNCTFEYVSQPLMDLLEGKQGNFKNLRFFVFKNIDGYFKI : 203
WHUHNCoV002 : IIRGWVFGTTLDSKTQSLLIVNNAITNVVIKVCDFQPCNDPFLGVYYHKNNKSWMESEFRVYSSANNCTFEYVSQPLMDLLEGKQGNFKNLRFFVFKNIDGYFKI : 203
WHUHNCoV003 : IIRGWVFGTTLDSKTQSLLIVNNAITNVVIKVCDFQPCNDPFLGVYYHKNNKSWMESEFRVYSSANNCTFEYVSQPLMDLLEGKQGNFKNLRFFVFKNIDGYFKI : 203
WHUHNCoV004 : IIRGWVFGTTLDSKTQSLLIVNNAITNVVIKVCDFQPCNDPFLGVYYHKNNKSWMESEFRVYSSANNCTFEYVSQPLMDLLEGKQGNFKNLRFFVFKNIDGYFKI : 203
WHUHNCoV005 : IIRGWVFGTTLDSKTQSLLIVNNAITNVVIKVCDFQPCNDPFLGVYYHKNNKSWMESEFRVYSSANNCTFEYVSQPLMDLLEGKQGNFKNLRFFVFKNIDGYFKI : 203
WHUHNCoV006 : IIRGWVFGTTLDSKTQSLLIVNNAITNVVIKVCDFQPCNDPFLGVYYHKNNKSWMESEFRVYSSANNCTFEYVSQPLMDLLEGKQGNFKNLRFFVFKNIDGYFKI : 203
WHUHNCoV007 : IIRGWVFGTTLDSKTQSLLIVNNAITNVVIKVCDFQPCNDPFLGVYYHKNNKSWMESEFRVYSSANNCTFEYVSQPLMDLLEGKQGNFKNLRFFVFKNIDGYFKI : 203
WHUHNCoV008 : IIRGWVFGTTLDSKTQSLLIVNNAITNVVIKVCDFQPCNDPFLGVYYHKNNKSWMESEFRVYSSANNCTFEYVSQPLMDLLEGKQGNFKNLRFFVFKNIDGYFKI : 203
WHUHNCoV011 : IIRGWVFGTTLDSKTQSLLIVNNAITNVVIKVCDFQPCNDPFLGVYYHKNNKSWMESEFRVYSSANNCTFEYVSQPLMDLLEGKQGNFKNLRFFVFKNIDGYFKI : 203
WHUHNCoV012 : IIRGWVFGTTLDSKTQSLLIVNNAITNVVIKVCDFQPCNDPFLGVYYHKNNKSWMESEFRVYSSANNCTFEYVSQPLMDLLEGKQGNFKNLRFFVFKNIDGYFKI : 203
WHUHNCoV020 : IIRGWVFGTTLDSKTQSLLIVNNAITNVVIKVCDFQPCNDPFLGVYYHKNNKSWMESEFRVYSSANNCTFEYVSQPLMDLLEGKQGNFKNLRFFVFKNIDGYFKI : 203
WHUHNCoV021 : IIRGWVFGTTLDSKTQSLLIVNNAITNVVIKVCDFQPCNDPFLGVYYHKNNKSWMESEFRVYSSANNCTFEYVSQPLMDLLEGKQGNFKNLRFFVFKNIDGYFKI : 203
66R6GW6FG3T61sk3QS66I6NNAITNV614VceF fC 1P51gvyyhknk wm efr65ssanNCTFEY6SqpF 616egkqGnFknLRFFV4N DG f6k
```

SARS-CoV/Tor2/FP1-10851 : YKGYQFIDVVRDLPLSGENILKPEIFKPLPLGINITFRALITAFS-----PAQDWTGTSAAAYFVGYLKPRTFFMLKYDENGTTTDAVDCALDPLSETKCTLKSFT : 294  
bat-SL-CoVZC45 : YSKHTFPIVLNRDLPLSLVLOPLVDELVPSINITKFRILLTTHRGDPMF---NNGWTAFSAAYFVGYLKPRTFFMLKYDENGTTTDAVDCALDPLSETKCTLKSFT : 303  
Wuhan-Hu-1 : YSKHTFPIVLNRDLPLSGENILKPEIFKPLPLGINITFRALITAFS-----PAQDWTGTSAAAYFVGYLKPRTFFMLKYDENGTTTDAVDCALDPLSETKCTLKSFT : 307  
WHUHNCoV001 : YSKHTFPIVLNRDLPLSGENILKPEIFKPLPLGINITFRALITAFS-----PAQDWTGTSAAAYFVGYLKPRTFFMLKYDENGTTTDAVDCALDPLSETKCTLKSFT : 307  
WHUHNCoV002 : YSKHTFPIVLNRDLPLSGENILKPEIFKPLPLGINITFRALITAFS-----PAQDWTGTSAAAYFVGYLKPRTFFMLKYDENGTTTDAVDCALDPLSETKCTLKSFT : 307  
WHUHNCoV003 : YSKHTFPIVLNRDLPLSGENILKPEIFKPLPLGINITFRALITAFS-----PAQDWTGTSAAAYFVGYLKPRTFFMLKYDENGTTTDAVDCALDPLSETKCTLKSFT : 307  
WHUHNCoV004 : YSKHTFPIVLNRDLPLSGENILKPEIFKPLPLGINITFRALITAFS-----PAQDWTGTSAAAYFVGYLKPRTFFMLKYDENGTTTDAVDCALDPLSETKCTLKSFT : 307  
WHUHNCoV005 : YSKHTFPIVLNRDLPLSGENILKPEIFKPLPLGINITFRALITAFS-----PAQDWTGTSAAAYFVGYLKPRTFFMLKYDENGTTTDAVDCALDPLSETKCTLKSFT : 307  
WHUHNCoV006 : YSKHTFPIVLNRDLPLSGENILKPEIFKPLPLGINITFRALITAFS-----PAQDWTGTSAAAYFVGYLKPRTFFMLKYDENGTTTDAVDCALDPLSETKCTLKSFT : 307  
WHUHNCoV007 : YSKHTFPIVLNRDLPLSGENILKPEIFKPLPLGINITFRALITAFS-----PAQDWTGTSAAAYFVGYLKPRTFFMLKYDENGTTTDAVDCALDPLSETKCTLKSFT : 307  
WHUHNCoV008 : YSKHTFPIVLNRDLPLSGENILKPEIFKPLPLGINITFRALITAFS-----PAQDWTGTSAAAYFVGYLKPRTFFMLKYDENGTTTDAVDCALDPLSETKCTLKSFT : 307  
WHUHNCoV011 : YSKHTFPIVLNRDLPLSGENILKPEIFKPLPLGINITFRALITAFS-----PAQDWTGTSAAAYFVGYLKPRTFFMLKYDENGTTTDAVDCALDPLSETKCTLKSFT : 307  
WHUHNCoV012 : YSKHTFPIVLNRDLPLSGENILKPEIFKPLPLGINITFRALITAFS-----PAQDWTGTSAAAYFVGYLKPRTFFMLKYDENGTTTDAVDCALDPLSETKCTLKSFT : 307  
WHUHNCoV020 : YSKHTFPIVLNRDLPLSGENILKPEIFKPLPLGINITFRALITAFS-----PAQDWTGTSAAAYFVGYLKPRTFFMLKYDENGTTTDAVDCALDPLSETKCTLKSFT : 307  
WHUHNCoV021 : YSKHTFPIVLNRDLPLSGENILKPEIFKPLPLGINITFRALITAFS-----PAQDWTGTSAAAYFVGYLKPRTFFMLKYDENGTTTDAVDCALDPLSETKCTLKSFT : 307  
YskhtP616vRdLPqGfsal P6vdLP6gINIT Fqt6La hrsyltpgdsssgWtagaAAI5VGYLqPrTF6LKYIENGTITDAVDCallPLsEtKC36KSft

SARS-CoV/Tor2/FP1-10851 : IDKGIYQTSNFRVVPSSGDVVRFPNITNLCPFGEVFNATRFASVYAWNRKRISNCVADYSVLYNSASFSTFKCYGVSPTKLDLCLFTNIVYADSFVIRGDEVQRQIA : 398  
bat-SL-CoVZC45 : VVKGIYQTSNFRVQPTOSVVRFPNITNLCPFGEVFNATRFASVYAWNRKRISNCVADYSVLYNSASFSTFKCYGVSPTKLDLCLFTNIVYADSFVIRGDEVQRQIA : 407  
Wuhan-Hu-1 : VBKGIYQTSNFRVQPTESIVRFPNITNLCPFGEVFNATRFASVYAWNRKRISNCVADYSVLYNSASFSTFKCYGVSPTKLDLCLFTNIVYADSFVIRGDEVQRQIA : 411  
WHUHNCoV001 : VBKGIYQTSNFRVQPTESIVRFPNITNLCPFGEVFNATRFASVYAWNRKRISNCVADYSVLYNSASFSTFKCYGVSPTKLDLCLFTNIVYADSFVIRGDEVQRQIA : 411  
WHUHNCoV002 : VBKGIYQTSNFRVQPTESIVRFPNITNLCPFGEVFNATRFASVYAWNRKRISNCVADYSVLYNSASFSTFKCYGVSPTKLDLCLFTNIVYADSFVIRGDEVQRQIA : 411  
WHUHNCoV003 : VBKGIYQTSNFRVQPTESIVRFPNITNLCPFGEVFNATRFASVYAWNRKRISNCVADYSVLYNSASFSTFKCYGVSPTKLDLCLFTNIVYADSFVIRGDEVQRQIA : 411  
WHUHNCoV004 : VBKGIYQTSNFRVQPTESIVRFPNITNLCPFGEVFNATRFASVYAWNRKRISNCVADYSVLYNSASFSTFKCYGVSPTKLDLCLFTNIVYADSFVIRGDEVQRQIA : 411  
WHUHNCoV005 : VBKGIYQTSNFRVQPTESIVRFPNITNLCPFGEVFNATRFASVYAWNRKRISNCVADYSVLYNSASFSTFKCYGVSPTKLDLCLFTNIVYADSFVIRGDEVQRQIA : 411  
WHUHNCoV006 : VBKGIYQTSNFRVQPTESIVRFPNITNLCPFGEVFNATRFASVYAWNRKRISNCVADYSVLYNSASFSTFKCYGVSPTKLDLCLFTNIVYADSFVIRGDEVQRQIA : 411  
WHUHNCoV007 : VBKGIYQTSNFRVQPTESIVRFPNITNLCPFGEVFNATRFASVYAWNRKRISNCVADYSVLYNSASFSTFKCYGVSPTKLDLCLFTNIVYADSFVIRGDEVQRQIA : 411  
WHUHNCoV008 : VBKGIYQTSNFRVQPTESIVRFPNITNLCPFGEVFNATRFASVYAWNRKRISNCVADYSVLYNSASFSTFKCYGVSPTKLDLCLFTNIVYADSFVIRGDEVQRQIA : 411  
WHUHNCoV011 : VBKGIYQTSNFRVQPTESIVRFPNITNLCPFGEVFNATRFASVYAWNRKRISNCVADYSVLYNSASFSTFKCYGVSPTKLDLCLFTNIVYADSFVIRGDEVQRQIA : 411  
WHUHNCoV012 : VBKGIYQTSNFRVQPTESIVRFPNITNLCPFGEVFNATRFASVYAWNRKRISNCVADYSVLYNSASFSTFKCYGVSPTKLDLCLFTNIVYADSFVIRGDEVQRQIA : 411  
WHUHNCoV020 : VBKGIYQTSNFRVQPTESIVRFPNITNLCPFGEVFNATRFASVYAWNRKRISNCVADYSVLYNSASFSTFKCYGVSPTKLDLCLFTNIVYADSFVIRGDEVQRQIA : 411  
WHUHNCoV021 : VBKGIYQTSNFRVQPTESIVRFPNITNLCPFGEVFNATRFASVYAWNRKRISNCVADYSVLYNSASFSTFKCYGVSPTKLDLCLFTNIVYADSFVIRGDEVQRQIA : 411  
6 KGIYQTSNFRVqP3 s6VRFPPNITNLCPFGEVFNAT4FaSVYAWNRk4IS1C6ADY3VLYNSasFSTFKCYGVS3KLnDLCLFT3nVYAD3F664gdeVRQ6A

SARS-CoV/Tor2/FP1-10851 : PGQTGKIADYNYKLPDDFPGCVIAWNSNLLDSKVGNGNYLYRLFRKSNLKPFFERDISTEIYQAGSTPCNGVEGFNCFYFPLOSYGFOPTNGVGYQPYRVVVLSE : 501  
bat-SL-CoVZC45 : PGQTGKIADYNYKLPDDFPGCVIAWNSNLLDSKVGNGNYLYRLFRKSNLKPFFERDISDEN-----G VRTLSYDFNENVPLEIYQATRVVVLSE : 492  
Wuhan-Hu-1 : PGQTGKIADYNYKLPDDFPGCVIAWNSNLLDSKVGNGNYLYRLFRKSNLKPFFERDISTEIYQAGSTPCNGVEGFNCFYFPLOSYGFOPTNGVGYQPYRVVVLSE : 515  
WHUHNCoV001 : PGQTGKIADYNYKLPDDFPGCVIAWNSNLLDSKVGNGNYLYRLFRKSNLKPFFERDISTEIYQAGSTPCNGVEGFNCFYFPLOSYGFOPTNGVGYQPYRVVVLSE : 515  
WHUHNCoV002 : PGQTGKIADYNYKLPDDFPGCVIAWNSNLLDSKVGNGNYLYRLFRKSNLKPFFERDISTEIYQAGSTPCNGVEGFNCFYFPLOSYGFOPTNGVGYQPYRVVVLSE : 515  
WHUHNCoV003 : PGQTGKIADYNYKLPDDFPGCVIAWNSNLLDSKVGNGNYLYRLFRKSNLKPFFERDISTEIYQAGSTPCNGVEGFNCFYFPLOSYGFOPTNGVGYQPYRVVVLSE : 515  
WHUHNCoV004 : PGQTGKIADYNYKLPDDFPGCVIAWNSNLLDSKVGNGNYLYRLFRKSNLKPFFERDISTEIYQAGSTPCNGVEGFNCFYFPLOSYGFOPTNGVGYQPYRVVVLSE : 515  
WHUHNCoV005 : PGQTGKIADYNYKLPDDFPGCVIAWNSNLLDSKVGNGNYLYRLFRKSNLKPFFERDISTEIYQAGSTPCNGVEGFNCFYFPLOSYGFOPTNGVGYQPYRVVVLSE : 515  
WHUHNCoV006 : PGQTGKIADYNYKLPDDFPGCVIAWNSNLLDSKVGNGNYLYRLFRKSNLKPFFERDISTEIYQAGSTPCNGVEGFNCFYFPLOSYGFOPTNGVGYQPYRVVVLSE : 515  
WHUHNCoV007 : PGQTGKIADYNYKLPDDFPGCVIAWNSNLLDSKVGNGNYLYRLFRKSNLKPFFERDISTEIYQAGSTPCNGVEGFNCFYFPLOSYGFOPTNGVGYQPYRVVVLSE : 515  
WHUHNCoV008 : PGQTGKIADYNYKLPDDFPGCVIAWNSNLLDSKVGNGNYLYRLFRKSNLKPFFERDISTEIYQAGSTPCNGVEGFNCFYFPLOSYGFOPTNGVGYQPYRVVVLSE : 515  
WHUHNCoV011 : PGQTGKIADYNYKLPDDFPGCVIAWNSNLLDSKVGNGNYLYRLFRKSNLKPFFERDISTEIYQAGSTPCNGVEGFNCFYFPLOSYGFOPTNGVGYQPYRVVVLSE : 515  
WHUHNCoV012 : PGQTGKIADYNYKLPDDFPGCVIAWNSNLLDSKVGNGNYLYRLFRKSNLKPFFERDISTEIYQAGSTPCNGVEGFNCFYFPLOSYGFOPTNGVGYQPYRVVVLSE : 515  
WHUHNCoV020 : PGQTGKIADYNYKLPDDFPGCVIAWNSNLLDSKVGNGNYLYRLFRKSNLKPFFERDISTEIYQAGSTPCNGVEGFNCFYFPLOSYGFOPTNGVGYQPYRVVVLSE : 515  
WHUHNCoV021 : PGQTGKIADYNYKLPDDFPGCVIAWNSNLLDSKVGNGNYLYRLFRKSNLKPFFERDISTEIYQAGSTPCNGVEGFNCFYFPLOSYGFOPTNGVGYQPYRVVVLSE : 515  
PGQTGKIADYNYKLPDDFPGCVIAWNSNLLDSKVGNGNYLYRLFRKSNLKPFFERDIS ei qagstpcngvegfncf pLq YgFqptng6gYQpyRVVVLSE



SARS-CoV/Tor2/FP1-10851 : ELLNAPATVCGPKLSTDLIKNQC VNFNFNGLTGTGVLTPSSKRFQLEFQOFGRDVSDFTISVDRPKTSEIILDISPCEFGGVSVIPFGTNSSEVAVLYQDVNCHD : 605  
bat-SL-CoVZC45 : ELLNAPATVCGPKLSTDLVKNQC VNFNFNGLTGTGVLTPSSKRFQSFQOFGKSDASDFIDSVDRPKTSEIILDITPCFSGGVSVIPFGTNSLEVAVLYQDVNCHD : 596  
Wuhan-Hu-1 : ELLHAPATVCGPKKSTNLVKNKCVNFNFNGLTGTGVLTPSSKKFLFQOFGRDVADPTDAVRDPOTLEILDITPCFSGGVSVIPFGTNSNOVAVLYQDVNCHD : 619  
WHUHNCoV001 : ELLHAPATVCGPKKSTNLVKNKCVNFNFNGLTGTGVLTPSSKKFLFQOFGRDVADPTDAVRDPOTLEILDITPCFSGGVSVIPFGTNSNOVAVLYQDVNCHD : 619  
WHUHNCoV002 : ELLHAPATVCGPKKSTNLVKNKCVNFNFNGLTGTGVLTPSSKKFLFQOFGRDVADPTDAVRDPOTLEILDITPCFSGGVSVIPFGTNSNOVAVLYQDVNCHD : 619  
WHUHNCoV003 : ELLHAPATVCGPKKSTNLVKNKCVNFNFNGLTGTGVLTPSSKKFLFQOFGRDVADPTDAVRDPOTLEILDITPCFSGGVSVIPFGTNSNOVAVLYQDVNCHD : 619  
WHUHNCoV004 : ELLHAPATVCGPKKSTNLVKNKCVNFNFNGLTGTGVLTPSSKKFLFQOFGRDVADPTDAVRDPOTLEILDITPCFSGGVSVIPFGTNSNOVAVLYQDVNCHD : 619  
WHUHNCoV005 : ELLHAPATVCGPKKSTNLVKNKCVNFNFNGLTGTGVLTPSSKKFLFQOFGRDVADPTDAVRDPOTLEILDITPCFSGGVSVIPFGTNSNOVAVLYQDVNCHD : 619  
WHUHNCoV006 : ELLHAPATVCGPKKSTNLVKNKCVNFNFNGLTGTGVLTPSSKKFLFQOFGRDVADPTDAVRDPOTLEILDITPCFSGGVSVIPFGTNSNOVAVLYQDVNCHD : 619  
WHUHNCoV007 : ELLHAPATVCGPKKSTNLVKNKCVNFNFNGLTGTGVLTPSSKKFLFQOFGRDVADPTDAVRDPOTLEILDITPCFSGGVSVIPFGTNSNOVAVLYQDVNCHD : 619  
WHUHNCoV008 : ELLHAPATVCGPKKSTNLVKNKCVNFNFNGLTGTGVLTPSSKKFLFQOFGRDVADPTDAVRDPOTLEILDITPCFSGGVSVIPFGTNSNOVAVLYQDVNCHD : 619  
WHUHNCoV011 : ELLHAPATVCGPKKSTNLVKNKCVNFNFNGLTGTGVLTPSSKKFLFQOFGRDVADPTDAVRDPOTLEILDITPCFSGGVSVIPFGTNSNOVAVLYQDVNCHD : 619  
WHUHNCoV012 : ELLHAPATVCGPKKSTNLVKNKCVNFNFNGLTGTGVLTPSSKKFLFQOFGRDVADPTDAVRDPOTLEILDITPCFSGGVSVIPFGTNSNOVAVLYQDVNCHD : 619  
WHUHNCoV020 : ELLHAPATVCGPKKSTNLVKNKCVNFNFNGLTGTGVLTPSSKKFLFQOFGRDVADPTDAVRDPOTLEILDITPCFSGGVSVIPFGTNSNOVAVLYQDVNCHD : 619  
WHUHNCoV021 : ELLHAPATVCGPKKSTNLVKNKCVNFNFNGLTGTGVLTPSSKKFLFQOFGRDVADPTDAVRDPOTLEILDITPCFSGGVSVIPFGTNSNOVAVLYQDVNCHD : 619  
ELLhAPATVCGPKkST L6KKNKCVNFNFNGLtGTGVLTeSnK4FlpFQQFG4D adTtDaVRDPqTlEILDI3PCsFGGVSVIPFGTnTsn2VAVLYQDVNCHD

SARS-CoV/Tor2/FP1-10851 : VETAIHADQLTPWRVYSTGNNVFPQTRAGCLLIGAEHVDTSYECDIPIGAGICASYQTHVSL---LRSTSKAIIIVAYTMSLGAENSIAYNNNTIAIPTNFSISIT : 705  
bat-SL-CoVZC45 : VETTIHADQLTPWRVYSTGNNVFPQTRAGCLLIGAEHVNSYECDIPIGAGICASYQTHASL---LRSTSKAIIIVAYTMSLGAENSIAYNNNTIAIPTNFSISIT : 696  
Wuhan-Hu-1 : VEVAIHADQLTPWRVYSTGNNVFPQTRAGCLLIGAEHVNSYECDIPIGAGICASYQTHNSPRRARSVASQSI IAYTMSLGAENSVAYNNNTIAIPTNFTISVT : 723  
WHUHNCoV001 : VEVAIHADQLTPWRVYSTGNNVFPQTRAGCLLIGAEHVNSYECDIPIGAGICASYQTHNSPRRARSVASQSI IAYTMSLGAENSVAYNNNTIAIPTNFTISVT : 723  
WHUHNCoV002 : VEVAIHADQLTPWRVYSTGNNVFPQTRAGCLLIGAEHVNSYECDIPIGAGICASYQTHNSPRRARSVASQSI IAYTMSLGAENSVAYNNNTIAIPTNFTISVT : 723  
WHUHNCoV003 : VEVAIHADQLTPWRVYSTGNNVFPQTRAGCLLIGAEHVNSYECDIPIGAGICASYQTHNSPRRARSVASQSI IAYTMSLGAENSVAYNNNTIAIPTNFTISVT : 723  
WHUHNCoV004 : VEVAIHADQLTPWRVYSTGNNVFPQTRAGCLLIGAEHVNSYECDIPIGAGICASYQTHNSPRRARSVASQSI IAYTMSLGAENSVAYNNNTIAIPTNFTISVT : 723  
WHUHNCoV005 : VEVAIHADQLTPWRVYSTGNNVFPQTRAGCLLIGAEHVNSYECDIPIGAGICASYQTHNSPRRARSVASQSI IAYTMSLGAENSVAYNNNTIAIPTNFTISVT : 723  
WHUHNCoV006 : VEVAIHADQLTPWRVYSTGNNVFPQTRAGCLLIGAEHVNSYECDIPIGAGICASYQTHNSPRRARSVASQSI IAYTMSLGAENSVAYNNNTIAIPTNFTISVT : 723  
WHUHNCoV007 : VEVAIHADQLTPWRVYSTGNNVFPQTRAGCLLIGAEHVNSYECDIPIGAGICASYQTHNSPRRARSVASQSI IAYTMSLGAENSVAYNNNTIAIPTNFTISVT : 723  
WHUHNCoV008 : VEVAIHADQLTPWRVYSTGNNVFPQTRAGCLLIGAEHVNSYECDIPIGAGICASYQTHNSPRRARSVASQSI IAYTMSLGAENSVAYNNNTIAIPTNFTISVT : 723  
WHUHNCoV011 : VEVAIHADQLTPWRVYSTGNNVFPQTRAGCLLIGAEHVNSYECDIPIGAGICASYQTHNSPRRARSVASQSI IAYTMSLGAENSVAYNNNTIAIPTNFTISVT : 723  
WHUHNCoV012 : VEVAIHADQLTPWRVYSTGNNVFPQTRAGCLLIGAEHVNSYECDIPIGAGICASYQTHNSPRRARSVASQSI IAYTMSLGAENSVAYNNNTIAIPTNFTISVT : 723  
WHUHNCoV020 : VEVAIHADQLTPWRVYSTGNNVFPQTRAGCLLIGAEHVNSYECDIPIGAGICASYQTHNSPRRARSVASQSI IAYTMSLGAENSVAYNNNTIAIPTNFTISVT : 723  
WHUHNCoV021 : VEVAIHADQLTPWRVYSTGNNVFPQTRAGCLLIGAEHVNSYECDIPIGAGICASYQTHNSPRRARSVASQSI IAYTMSLGAENSVAYNNNTIAIPTNFTISVT : 723  
VpvaIHADQLTPtWR6YsTG NVFQTRAGCLLIGAEHVlNSYECDIPIGAGICASYqTq3nprraRsvasqsI6AYTMSLGAENs6AYsNN3IAIPTNF3IS6T

SARS-CoV/Tor2/FP1-10851 : TEVMPVSMKRTSVDCIMYICGDSIECSNLLLYQGSFCTQLNRRALSGIAAEQDKNTDEVFAQVKQIYKTPPIKDFGGFNFSQILPDPSPKPKRSFIEDLLFNKVT : 809  
bat-SL-CoVZC45 : TEVMPVSMKRTSVDCIMYICGDSIECSNLLLYQGSFCTQLNRRALSGIAAEQDKNTDEVFAQVKQIYKTPPIKDFGGFNFSQILPDPSPKPKRSFIEDLLFNKVT : 800  
Wuhan-Hu-1 : TEILPVSMKRTSVDCIMYICGDSIECSNLLLYQGSFCTQLNRRALSGIAAEQDKNTDEVFAQVKQIYKTPPIKDFGGFNFSQILPDPSPKPKRSFIEDLLFNKVT : 827  
WHUHNCoV001 : TEILPVSMKRTSVDCIMYICGDSIECSNLLLYQGSFCTQLNRRALSGIAAEQDKNTDEVFAQVKQIYKTPPIKDFGGFNFSQILPDPSPKPKRSFIEDLLFNKVT : 827  
WHUHNCoV002 : TEILPVSMKRTSVDCIMYICGDSIECSNLLLYQGSFCTQLNRRALSGIAAEQDKNTDEVFAQVKQIYKTPPIKDFGGFNFSQILPDPSPKPKRSFIEDLLFNKVT : 827  
WHUHNCoV003 : TEILPVSMKRTSVDCIMYICGDSIECSNLLLYQGSFCTQLNRRALSGIAAEQDKNTDEVFAQVKQIYKTPPIKDFGGFNFSQILPDPSPKPKRSFIEDLLFNKVT : 827  
WHUHNCoV004 : TEILPVSMKRTSVDCIMYICGDSIECSNLLLYQGSFCTQLNRRALSGIAAEQDKNTDEVFAQVKQIYKTPPIKDFGGFNFSQILPDPSPKPKRSFIEDLLFNKVT : 827  
WHUHNCoV005 : TEILPVSMKRTSVDCIMYICGDSIECSNLLLYQGSFCTQLNRRALSGIAAEQDKNTDEVFAQVKQIYKTPPIKDFGGFNFSQILPDPSPKPKRSFIEDLLFNKVT : 827  
WHUHNCoV006 : TEILPVSMKRTSVDCIMYICGDSIECSNLLLYQGSFCTQLNRRALSGIAAEQDKNTDEVFAQVKQIYKTPPIKDFGGFNFSQILPDPSPKPKRSFIEDLLFNKVT : 827  
WHUHNCoV007 : TEILPVSMKRTSVDCIMYICGDSIECSNLLLYQGSFCTQLNRRALSGIAAEQDKNTDEVFAQVKQIYKTPPIKDFGGFNFSQILPDPSPKPKRSFIEDLLFNKVT : 827  
WHUHNCoV008 : TEILPVSMKRTSVDCIMYICGDSIECSNLLLYQGSFCTQLNRRALSGIAAEQDKNTDEVFAQVKQIYKTPPIKDFGGFNFSQILPDPSPKPKRSFIEDLLFNKVT : 827  
WHUHNCoV011 : TEILPVSMKRTSVDCIMYICGDSIECSNLLLYQGSFCTQLNRRALSGIAAEQDKNTDEVFAQVKQIYKTPPIKDFGGFNFSQILPDPSPKPKRSFIEDLLFNKVT : 827  
WHUHNCoV012 : TEILPVSMKRTSVDCIMYICGDSIECSNLLLYQGSFCTQLNRRALSGIAAEQDKNTDEVFAQVKQIYKTPPIKDFGGFNFSQILPDPSPKPKRSFIEDLLFNKVT : 827  
WHUHNCoV020 : TEILPVSMKRTSVDCIMYICGDSIECSNLLLYQGSFCTQLNRRALSGIAAEQDKNTDEVFAQVKQIYKTPPIKDFGGFNFSQILPDPSPKPKRSFIEDLLFNKVT : 827  
WHUHNCoV021 : TEILPVSMKRTSVDCIMYICGDSIECSNLLLYQGSFCTQLNRRALSGIAAEQDKNTDEVFAQVKQIYKTPPIKDFGGFNFSQILPDPSPKPKRSFIEDLLFNKVT : 827  
TE66PVSMtKRTSVDCtMYICGDSIECSNLLLYQGSFCTQLNRRALSGIA EQDNTqEVFAQVKQYKTPp6KdFGGFNFSQILPDPsKP3KRSFIEDLLFNKVT



```

*          1160          *          1180          *          1200          *          1220          *          1240
SARS-CoV/Tor2/FP1-10851 : PLOPELDSFREELDKYFKNHTSPDVLGDISGINASVVNIQKEIDRLNEVAKNINESLIDLQELGKYEYIKWPFYVWLGFIAGLIAIVMVTILICMTSCCSC : 1225
bat-SL-CoVZC45 : PLOPELDSFREELDKYFKNHTSPDIDLGDISGINASVVNIQKEIDRLNEVAKNINESLIDLQELGKYEYIKWPFYVWLGFIAGLIAIVMVTILICMTSCCSC : 1216
Wuhan-Hu-1 : PLOPELDSFREELDKYFKNHTSPDVLGDISGINASVVNIQKEIDRLNEVAKNINESLIDLQELGKYEYIKWPFYVWLGFIAGLIAIVMVTILICMTSCCSC : 1243
WHUHNCoV001 : PLOPELDSFREELDKYFKNHTSPDVLGDISGINASVVNIQKEIDRLNEVAKNINESLIDLQELGKYEYIKWPFYVWLGFIAGLIAIVMVTILICMTSCCSC : 1243
WHUHNCoV002 : PLOPELDSFREELDKYFKNHTSPDVLGDISGINASVVNIQKEIDRLNEVAKNINESLIDLQELGKYEYIKWPFYVWLGFIAGLIAIVMVTILICMTSCCSC : 1243
WHUHNCoV003 : PLOPELDSFREELDKYFKNHTSPDVLGDISGINASVVNIQKEIDRLNEVAKNINESLIDLQELGKYEYIKWPFYVWLGFIAGLIAIVMVTILICMTSCCSC : 1243
WHUHNCoV004 : PLOPELDSFREELDKYFKNHTSPDVLGDISGINASVVNIQKEIDRLNEVAKNINESLIDLQELGKYEYIKWPFYVWLGFIAGLIAIVMVTILICMTSCCSC : 1243
WHUHNCoV005 : PLOPELDSFREELDKYFKNHTSPDVLGDISGINASVVNIQKEIDRLNEVAKNINESLIDLQELGKYEYIKWPFYVWLGFIAGLIAIVMVTILICMTSCCSC : 1243
WHUHNCoV006 : PLOPELDSFREELDKYFKNHTSPDVLGDISGINASVVNIQKEIDRLNEVAKNINESLIDLQELGKYEYIKWPFYVWLGFIAGLIAIVMVTILICMTSCCSC : 1243
WHUHNCoV007 : PLOPELDSFREELDKYFKNHTSPDVLGDISGINASVVNIQKEIDRLNEVAKNINESLIDLQELGKYEYIKWPFYVWLGFIAGLIAIVMVTILICMTSCCSC : 1243
WHUHNCoV008 : PLOPELDSFREELDKYFKNHTSPDVLGDISGINASVVNIQKEIDRLNEVAKNINESLIDLQELGKYEYIKWPFYVWLGFIAGLIAIVMVTILICMTSCCSC : 1243
WHUHNCoV011 : PLOPELDSFREELDKYFKNHTSPDVLGDISGINASVVNIQKEIDRLNEVAKNINESLIDLQELGKYEYIKWPFYVWLGFIAGLIAIVMVTILICMTSCCSC : 1243
WHUHNCoV012 : PLOPELDSFREELDKYFKNHTSPDVLGDISGINASVVNIQKEIDRLNEVAKNINESLIDLQELGKYEYIKWPFYVWLGFIAGLIAIVMVTILICMTSCCSC : 1243
WHUHNCoV020 : PLOPELDSFREELDKYFKNHTSPDVLGDISGINASVVNIQKEIDRLNEVAKNINESLIDLQELGKYEYIKWPFY----- : 1215
WHUHNCoV021 : PLOPELDSFREELDKYFKNHTSPDVLGDISGINASVVNIQKEIDRLNEVAKNINESLIDLQELGKYEYIKWPFYVWLGFIAGLIAIVMVTILICMTSCCSC : 1243
PLOPELDSFREELDKYFKNHTSPD6LDISGINASVVNIQKEIDRLNEVA4NINESLIDLQELGKYEYIKWPFY wlgfiagliaivmvti lccmtscsc

```

```

*          1260          *
SARS-CoV/Tor2/FP1-10851 : LKGCCSCGSCCKFDEDDSEPVKGVKLYHT : 1255
bat-SL-CoVZC45 : LKGCCSCGSCCKFDEDDSEPVKGVKLYHT : 1246
Wuhan-Hu-1 : LKGCCSCGSCCKFDEDDSEPVKGVKLYHT : 1273
WHUHNCoV001 : LKGCCSCGSCCKFDEDDSEPVKGVKLYHT : 1273
WHUHNCoV002 : LKGCCSCGSCCKFDEDDSEPVKGVKLYHT : 1273
WHUHNCoV003 : LKGCCSCGSCCKFDEDDSEPVKGVKLYHT : 1273
WHUHNCoV004 : LKGCCSCGSCCKFDEDDSEPVKGVKLYHT : 1273
WHUHNCoV005 : LKGCCSCGSCCKFDEDDSEPVKGVKLYHT : 1273
WHUHNCoV006 : LKGCCSCGSCCKFDEDDSEPVKGVKLYHT : 1273
WHUHNCoV007 : LKGCCSCGSCCKFDEDDSEPVKGVKLYHT : 1273
WHUHNCoV008 : LKGCCSCGSCCKFDEDDSEPVKGVKLYHT : 1273
WHUHNCoV011 : LKGCCSCGSCCKFDEDDSEPVKGVKLYHT : 1273
WHUHNCoV012 : LKGCCSCGSCCKFDEDDSEPVKGVKLYHT : 1273
WHUHNCoV020 : ----- : -
WHUHNCoV021 : LKGCCSCGSCCKFDEDDSEPVKGVKLYHT : 1273
lkgccscgscckfdeddsepvkgvklyht

```

Figure S2 Comparison of amino acid sequence of N protein between 2019-nCoV from our 12 samples and Wuhan-Hu-1 (NC\_045512.2)

The structure of N protein is stable and conserved.

```
                *      20      *      40      *      60      *      80      *      100      *
Wuhan-Hu-1 : MSDNGPQQRNAPRI TFGGSDSTGSGNNGERSGARSKQRRPQGLPNNTASWFTALTQHGKEDLKFPRGQVPIINTNSSPDDQIGYYRRATRRI RGGDGKMKDLSPRWYFYYLGTGF : 117
WHUHNCoV001 : MSDNGPQQRNAPRI TFGGSDSTGSGNNGERSGARSKQRRPQGLPNNTASWFTALTQHGKEDLKFPRGQVPIINTNSSPDDQIGYYRRATRRI RGGDGKMKDLSPRWYFYYLGTGF : 117
WHUHNCoV002 : MSDNGPQQRNAPRI TFGGSDSTGSGNNGERSGARSKQRRPQGLPNNTASWFTALTQHGKEDLKFPRGQVPIINTNSSPDDQIGYYRRATRRI RGGDGKMKDLSPRWYFYYLGTGF : 117
WHUHNCoV003 : MSDNGPQQRNAPRI TFGGSDSTGSGNNGERSGARSKQRRPQGLPNNTASWFTALTQHGKEDLKFPRGQVPIINTNSSPDDQIGYYRRATRRI RGGDGKMKDLSPRWYFYYLGTGF : 117
WHUHNCoV004 : MSDNGPQQRNAPRI TFGGSDSTGSGNNGERSGARSKQRRPQGLPNNTASWFTALTQHGKEDLKFPRGQVPIINTNSSPDDQIGYYRRATRRI RGGDGKMKDLSPRWYFYYLGTGF : 117
WHUHNCoV005 : MSDNGPQQRNAPRI TFGGSDSTGSGNNGERSGARSKQRRPQGLPNNTASWFTALTQHGKEDLKFPRGQVPIINTNSSPDDQIGYYRRATRRI RGGDGKMKDLSPRWYFYYLGTGF : 117
WHUHNCoV006 : MSDNGPQQRNAPRI TFGGSDSTGSGNNGERSGARSKQRRPQGLPNNTASWFTALTQHGKEDLKFPRGQVPIINTNSSPDDQIGYYRRATRRI RGGDGKMKDLSPRWYFYYLGTGF : 117
WHUHNCoV007 : MSDNGPQQRNAPRI TFGGSDSTGSGNNGERSGARSKQRRPQGLPNNTASWFTALTQHGKEDLKFPRGQVPIINTNSSPDDQIGYYRRATRRI RGGDGKMKDLSPRWYFYYLGTGF : 117
WHUHNCoV008 : MSDNGPQQRNAPRI TFGGSDSTGSGNNGERSGARSKQRRPQGLPNNTASWFTALTQHGKEDLKFPRGQVPIINTNSSPDDQIGYYRRATRRI RGGDGKMKDLSPRWYFYYLGTGF : 117
WHUHNCoV011 : MSDNGPQQRNAPRI TFGGSDSTGSGNNGERSGARSKQRRPQGLPNNTASWFTALTQHGKEDLKFPRGQVPIINTNSSPDDQIGYYRRATRRI RGGDGKMKDLSPRWYFYYLGTGF : 117
WHUHNCoV012 : MSDNGPQQRNAPRI TFGGSDSTGSGNNGERSGARSKQRRPQGLPNNTASWFTALTQHGKEDLKFPRGQVPIINTNSSPDDQIGYYRRATRRI RGGDGKMKDLSPRWYFYYLGTGF : 117
WHUHNCoV020 : MSDNGPQQRNAPRI TFGGSDSTGSGNNGERSGARSKQRRPQGLPNNTASWFTALTQHGKEDLKFPRGQVPIINTNSSPDDQIGYYRRATRRI RGGDGKMKDLSPRWYFYYLGTGF : 117
WHUHNCoV021 : MSDNGPQQRNAPRI TFGGSDSTGSGNNGERSGARSKQRRPQGLPNNTASWFTALTQHGKEDLKFPRGQVPIINTNSSPDDQIGYYRRATRRI RGGDGKMKDLSPRWYFYYLGTGF : 117
MSDNGPQQRNAPRI TFGGSDSTGSGNNGERSGARSKQRRPQGLPNNTASWFTALTQHGKEDLKFPRGQVPIINTNSSPDDQIGYYRRATRRI RGGDGKMKDLSPRWYFYYLGTGF

                120      *      140      *      160      *      180      *      200      *      220      *
Wuhan-Hu-1 : EAGLPYGANKDGI IWVATEGALNTPKDHIGTRNPANNAIVLQLPQGTTL PKGFYAEGRSGGSQASSRSSRSRNSRSTPGSSRGTS PARMAGNGGDAALALLLLDRLNQLLESKM : 234
WHUHNCoV001 : EAGLPYGANKDGI IWVATEGALNTPKDHIGTRNPANNAIVLQLPQGTTL PKGFYAEGRSGGSQASSRSSRSRNSRSTPGSSRGTS PARMAGNGGDAALALLLLDRLNQLLESKM : 234
WHUHNCoV002 : EAGLPYGANKDGI IWVATEGALNTPKDHIGTRNPANNAIVLQLPQGTTL PKGFYAEGRSGGSQASSRSSRSRNSRSTPGSSRGTS PARMAGNGGDAALALLLLDRLNQLLESKM : 234
WHUHNCoV003 : EAGLPYGANKDGI IWVATEGALNTPKDHIGTRNPANNAIVLQLPQGTTL PKGFYAEGRSGGSQASSRSSRSRNSRSTPGSSRGTS PARMAGNGGDAALALLLLDRLNQLLESKM : 234
WHUHNCoV004 : EAGLPYGANKDGI IWVATEGALNTPKDHIGTRNPANNAIVLQLPQGTTL PKGFYAEGRSGGSQASSRSSRSRNSRSTPGSSRGTS PARMAGNGGDAALALLLLDRLNQLLESKM : 234
WHUHNCoV005 : EAGLPYGANKDGI IWVATEGALNTPKDHIGTRNPANNAIVLQLPQGTTL PKGFYAEGRSGGSQASSRSSRSRNSRSTPGSSRGTS PARMAGNGGDAALALLLLDRLNQLLESKM : 234
WHUHNCoV006 : EAGLPYGANKDGI IWVATEGALNTPKDHIGTRNPANNAIVLQLPQGTTL PKGFYAEGRSGGSQASSRSSRSRNSRSTPGSSRGTS PARMAGNGGDAALALLLLDRLNQLLESKM : 234
WHUHNCoV007 : EAGLPYGANKDGI IWVATEGALNTPKDHIGTRNPANNAIVLQLPQGTTL PKGFYAEGRSGGSQASSRSSRSRNSRSTPGSSRGTS PARMAGNGGDAALALLLLDRLNQLLESKM : 234
WHUHNCoV008 : EAGLPYGANKDGI IWVATEGALNTPKDHIGTRNPANNAIVLQLPQGTTL PKGFYAEGRSGGSQASSRSSRSRNSRSTPGSSRGTS PARMAGNGGDAALALLLLDRLNQLLESKM : 234
WHUHNCoV011 : EAGLPYGANKDGI IWVATEGALNTPKDHIGTRNPANNAIVLQLPQGTTL PKGFYAEGRSGGSQASSRSSRSRNSRSTPGSSRGTS PARMAGNGGDAALALLLLDRLNQLLESKM : 234
WHUHNCoV012 : EAGLPYGANKDGI IWVATEGALNTPKDHIGTRNPANNAIVLQLPQGTTL PKGFYAEGRSGGSQASSRSSRSRNSRSTPGSSRGTS PARMAGNGGDAALALLLLDRLNQLLESKM : 234
WHUHNCoV020 : EAGLPYGANKDGI IWVATEGALNTPKDHIGTRNPANNAIVLQLPQGTTL PKGFYAEGRSGGSQASSRSSRSRNSRSTPGSSRGTS PARMAGNGGDAALALLLLDRLNQLLESKM : 234
WHUHNCoV021 : EAGLPYGANKDGI IWVATEGALNTPKDHIGTRNPANNAIVLQLPQGTTL PKGFYAEGRSGGSQASSRSSRSRNSRSTPGSSRGTS PARMAGNGGDAALALLLLDRLNQLLESKM : 234
EAGLPYGANKDGI IWVATEGALNTPKDHIGTRNPANNAIVLQLPQGTTL PKGFYAEGRSGGSQASSRSSRSRNSRSTPGSSRGTS PARMAGNGGDAALALLLLDRLNQLLESKM

                240      *      260      *      280      *      300      *      320      *      340      *
Wuhan-Hu-1 : SGKGOOQGGQTVTKKSAAEASKKPRQKRTATKAYNVTAQFGRRGPEQTQGNFGDQELIRQGTDYKHWHPQIAQFAPSASAFFGMSRI GMEVTPSGTWLTYTGAI KLDDKDPNFKDQVI : 351
WHUHNCoV001 : SGKGOOQGGQTVTKKSAAEASKKPRQKRTATKAYNVTAQFGRRGPEQTQGNFGDQELIRQGTDYKHWHPQIAQFAPSASAFFGMSRI GMEVTPSGTWLTYTGAI KLDDKDPNFKDQVI : 351
WHUHNCoV002 : SGKGOOQGGQTVTKKSAAEASKKPRQKRTATKAYNVTAQFGRRGPEQTQGNFGDQELIRQGTDYKHWHPQIAQFAPSASAFFGMSRI GMEVTPSGTWLTYTGAI KLDDKDPNFKDQVI : 351
WHUHNCoV003 : SGKGOOQGGQTVTKKSAAEASKKPRQKRTATKAYNVTAQFGRRGPEQTQGNFGDQELIRQGTDYKHWHPQIAQFAPSASAFFGMSRI GMEVTPSGTWLTYTGAI KLDDKDPNFKDQVI : 351
WHUHNCoV004 : SGKGOOQGGQTVTKKSAAEASKKPRQKRTATKAYNVTAQFGRRGPEQTQGNFGDQELIRQGTDYKHWHPQIAQFAPSASAFFGMSRI GMEVTPSGTWLTYTGAI KLDDKDPNFKDQVI : 351
WHUHNCoV005 : SGKGOOQGGQTVTKKSAAEASKKPRQKRTATKAYNVTAQFGRRGPEQTQGNFGDQELIRQGTDYKHWHPQIAQFAPSASAFFGMSRI GMEVTPSGTWLTYTGAI KLDDKDPNFKDQVI : 351
WHUHNCoV006 : SGKGOOQGGQTVTKKSAAEASKKPRQKRTATKAYNVTAQFGRRGPEQTQGNFGDQELIRQGTDYKHWHPQIAQFAPSASAFFGMSRI GMEVTPSGTWLTYTGAI KLDDKDPNFKDQVI : 351
WHUHNCoV007 : SGKGOOQGGQTVTKKSAAEASKKPRQKRTATKAYNVTAQFGRRGPEQTQGNFGDQELIRQGTDYKHWHPQIAQFAPSASAFFGMSRI GMEVTPSGTWLTYTGAI KLDDKDPNFKDQVI : 351
WHUHNCoV008 : SGKGOOQGGQTVTKKSAAEASKKPRQKRTATKAYNVTAQFGRRGPEQTQGNFGDQELIRQGTDYKHWHPQIAQFAPSASAFFGMSRI GMEVTPSGTWLTYTGAI KLDDKDPNFKDQVI : 351
WHUHNCoV011 : SGKGOOQGGQTVTKKSAAEASKKPRQKRTATKAYNVTAQFGRRGPEQTQGNFGDQELIRQGTDYKHWHPQIAQFAPSASAFFGMSRI GMEVTPSGTWLTYTGAI KLDDKDPNFKDQVI : 351
WHUHNCoV012 : SGKGOOQGGQTVTKKSAAEASKKPRQKRTATKAYNVTAQFGRRGPEQTQGNFGDQELIRQGTDYKHWHPQIAQFAPSASAFFGMSRI GMEVTPSGTWLTYTGAI KLDDKDPNFKDQVI : 351
WHUHNCoV020 : SGKGOOQGGQTVTKKSAAEASKKPRQKRTATKAYNVTAQFGRRGPEQTQGNFGDQELIRQGTDYKHWHPQIAQFAPSASAFFGMSRI GMEVTPSGTWLTYTGAI KLDDKDPNFKDQVI : 351
WHUHNCoV021 : SGKGOOQGGQTVTKKSAAEASKKPRQKRTATKAYNVTAQFGRRGPEQTQGNFGDQELIRQGTDYKHWHPQIAQFAPSASAFFGMSRI GMEVTPSGTWLTYTGAI KLDDKDPNFKDQVI : 351
SGKGOOQGGQTVTKKSAAEASKKPRQKRTATKAYNVTAQFGRRGPEQTQGNFGDQELIRQGTDYKHWHPQIAQFAPSASAFFGMSRI GMEVTPSGTWLTYTGAI KLDDKDPNFKDQVI
```

360 \* 380 \* 400 \*

Wuhan-Hu-1 : LLNKHIDAYKTFPPTEPKKDKKKKADETQALPQRQKKQQTVTLPAADLDDFSKQLQQSMSSADSTQA : 419  
WHUHNCoV001 : LLNKHIDAYKTFPPTEPKKDKKKKADETQALPQRQKKQQTVTLPAADLDDFSKQLQQSMSSADSTQA : 419  
WHUHNCoV002 : LLNKHIDAYKTFPPTEPKKDKKKKADETQALPQRQKKQQTVTLPAADLDDFSKQLQQSMSSADSTQA : 419  
WHUHNCoV003 : LLNKHIDAYKTFPPTEPKKDKKKKADETQALPQRQKKQQTVTLPAADLDDFSKQLQQSMSSADSTQA : 419  
WHUHNCoV004 : LLNKHIDAYKTFPPTEPKKDKKKKADETQALPQRQKKQQTVTLPAADLDDFSKQLQQSMSSADSTQA : 419  
WHUHNCoV005 : LLNKHIDAYKTFPPTEPKKDKKKKADETQALPQRQKKQQTVTLPAADLDDFSKQLQQSMSSADSTQA : 419  
WHUHNCoV006 : LLNKHIDAYKTFPPTEPKKDKKKKADETQALPQRQKKQQTVTLPAADLDDFSKQLQQSMSSADSTQA : 419  
WHUHNCoV007 : LLNKHIDAYKTFPPTEPKKDKKKKADETQALPQRQKKQQTVTLPAADLDDFSKQLQQSMSSADSTQA : 419  
WHUHNCoV008 : LLNKHIDAYKTFPPTEPKKDKKKKADETQALPQRQKKQQTVTLPAADLDDFSKQLQQSMSSADSTQA : 419  
WHUHNCoV011 : LLNKHIDAYKTFPPTEPKKDKKKKADETQALPQRQKKQQTVTLPAADLDDFSKQLQQSMSSADSTQA : 419  
WHUHNCoV012 : LLNKHIDAYKTFPPTEPKKDKKKKADETQALPQRQKKQQTVTLPAADLDDFSKQLQQSMSSADSTQA : 419  
WHUHNCoV020 : LLNKHIDAYKTFPPTEPKKDKKKKADETQALPQRQKKQQTVTLPAADLDDFSKQLQQSMSSADSTQA : 419  
WHUHNCoV021 : LLNKHIDAYKTFPPTEPKKDKKKKADETQALPQRQKKQQTVTLPAADLDDFSKQLQQSMSSADSTQA : 419  
LLNKHIDAYKTFPPTEPKKDKKKKADETQALPQRQKKQQTVTLPAADLDDFSKQLQQSMSSADSTQA

**Figure S3 The phylogenetic tree of full-genome of 2019-nCoV from our 12 samples, 10 previously identified 2019-nCoV and other coronavirus**

The phylogenetic tree was aligned with the use of FFT-NS-2 model. Maximum-likelihood phylogenies were inferred under a generalized-time-reversal (GTR)+ Gamma substitution model and bootstrapped 1000 times to assess confidence. 2019-nCoVs form a monophyletic clade with a bootstrap support of 100%. The most closely related sequence to this clade is bat-SL-CoV.

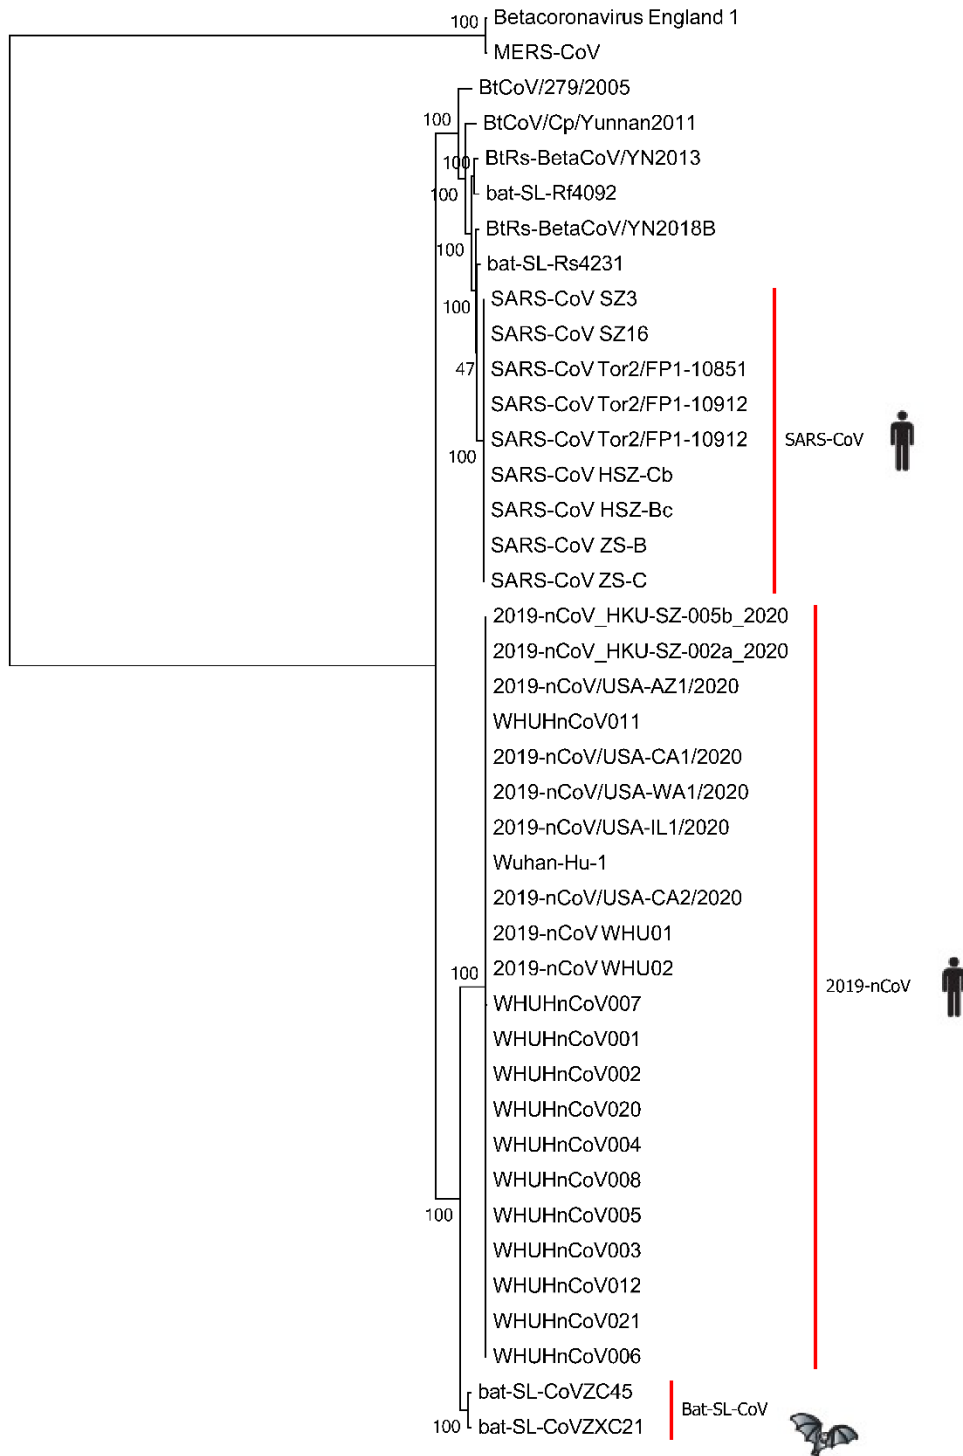

Figure S4 The phylogenetic tree of Spike protein between 2019-nCoV from our 12 samples, 10 previously identified 2019-nCoV and other coronavirus

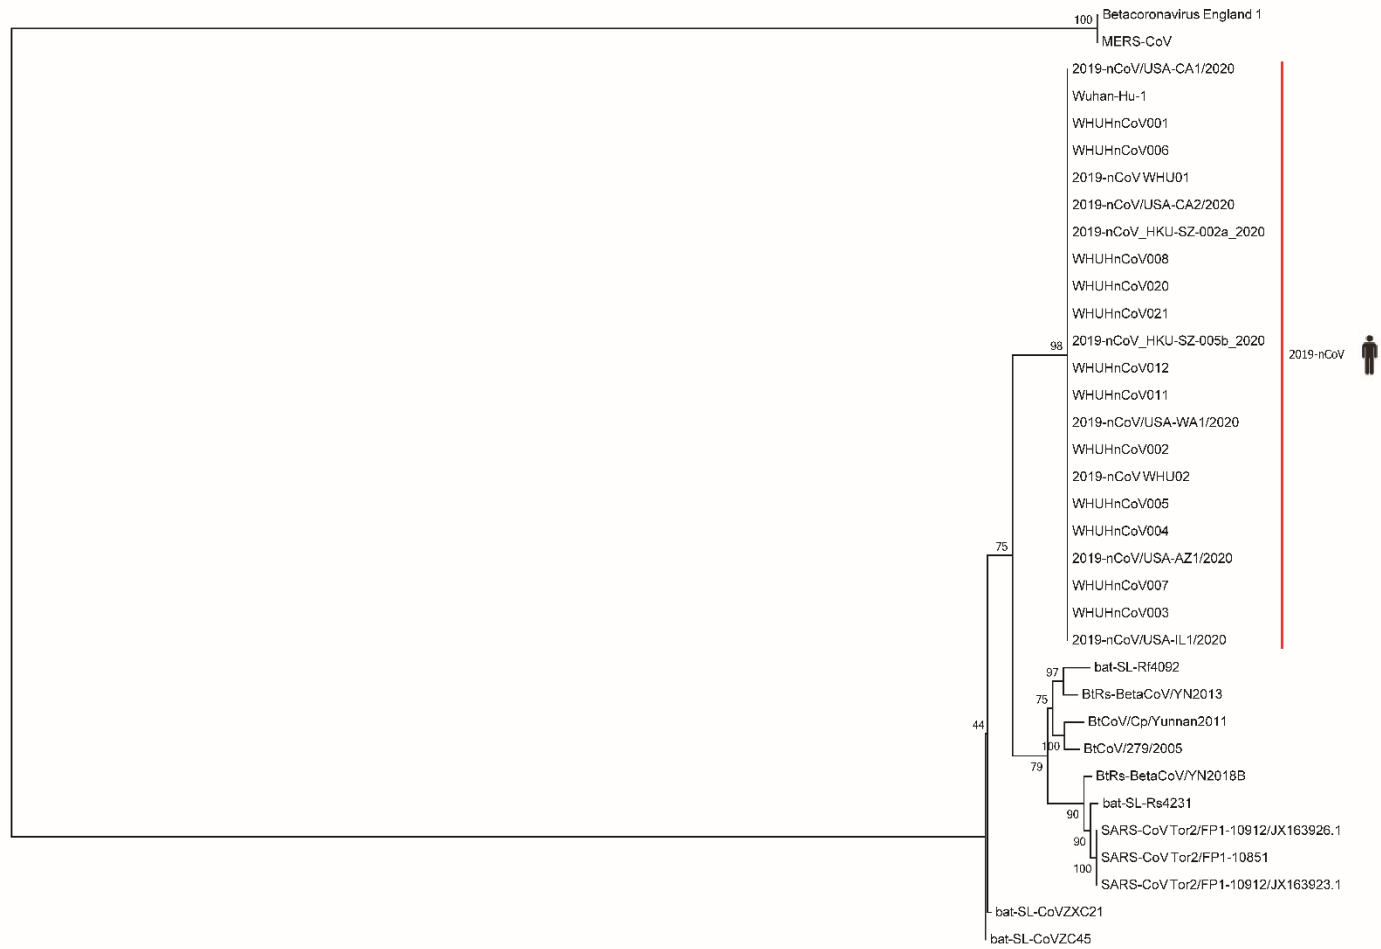

**Figure S5 Chest radiographs and computed tomography (CT) of HCW O**

Nurse O who was a highly suspected case had negative viral nucleic acid tests but had COVID-19-like symptoms and imaging findings. There is a flaky GGO under the pleura in the middle lobe of right lung on Jan 18, 2020. The density of lesion increased, and the interlobular septum thickened, showing paving stones sign as well as interpleural pleura traction, and a GGO appear in the posterior basal segment of the left lung on Jan 22, 2020. The range and the density of lesions in the right middle lobe reduced, and the lesion in the posterior basal and outer basal segments of the lower lobe of the left lung is enlarged and the density increased on Jan 27, 2020. Most of the lesions disappeared, leaving a few GGO and fiber cable shadows on Feb 13, 2020, 29 days after the onset of illness. The infiltrated can be waning.

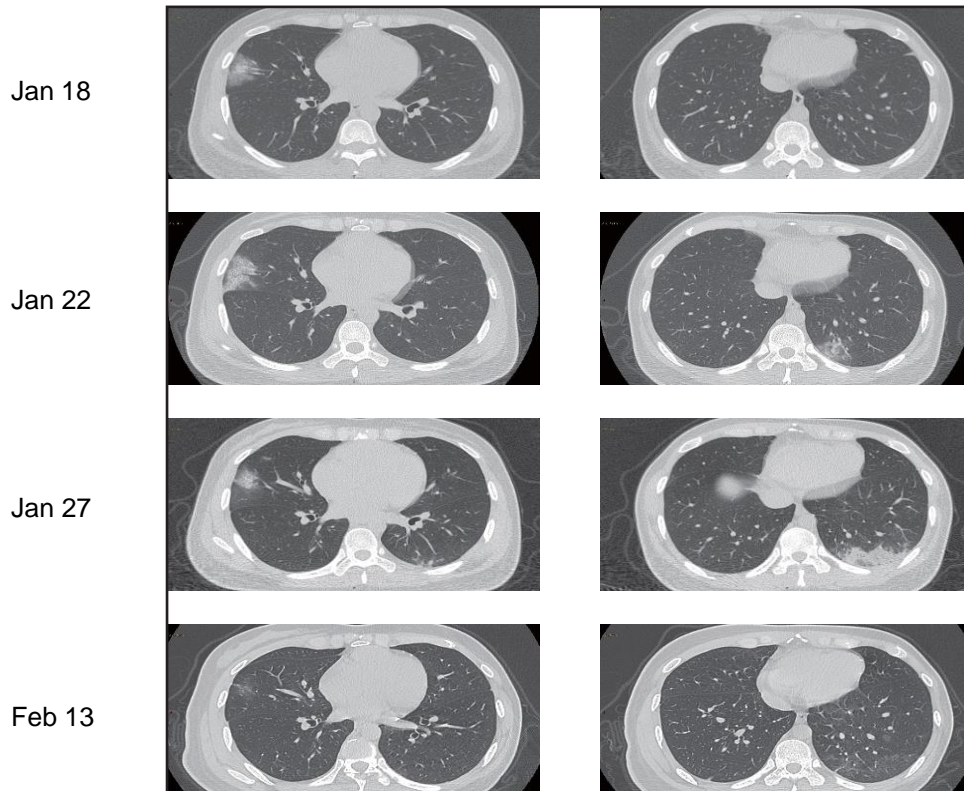



## Supplementary Tables

**Table S1 Clinical Characteristics and Treatments in Patients with Laboratory-Confirmed Novel Coronavirus Pneumonia**

| Variable                               | Value    |
|----------------------------------------|----------|
| <b>Signs and symptoms on admission</b> | N*=35    |
| Fever                                  |          |
| Any — no. (%)                          | 30(85.7) |
| Maximal temperature — °C               | 38.8±1.4 |
| 37.3–38.0°C                            | 7(23.3)  |
| 38.1–39.0°C                            | 12(40)   |
| >39.0°C                                | 4(13.3)  |
| N/A                                    | 7(23.3)  |
| Cough — no. (%)                        | 19(54.3) |
| Chest tightness — no. (%)              | 14(40)   |
| Myalgia — no. (%)                      | 16(45.7) |
| Malaise — no. (%)                      | 26(74.3) |
| Headache — no. (%)                     | 13(37.1) |
| Sore throat — no. (%)                  | 17(48.6) |
| Rhinorrhoea — no. (%)                  | 6(17.1)  |
| Poor appetite — no. (%)                | 22(62.9) |
| Nausea and vomiting — no. (%)          | 3(8.6)   |
| Diarrhoea — no. (%)                    | 9(25.7)  |
| Palpitation — no. (%)                  | 4(11.4)  |
| Chest pain — no. (%)                   | 4(11.4)  |
| Night sweat — no. (%)                  | 1(2.9)   |
| Rash — no. (%)                         | 1(2.9)   |
| Hypoxemia — no. (%)                    | 3(8.6)   |
| <b>Treatment</b> — no. (%)             |          |
| Glucocorticoids                        | 0        |
| Oxygen therapy                         | 6(17.1%) |

\*N represents the number of included patients.

**Table S2 Laboratory results of Patients with Laboratory-Confirmed Novel Coronavirus Pneumonia**

| Characteristic                       | Value       |
|--------------------------------------|-------------|
| <b>Laboratory exams on admission</b> |             |
| <b>Blood routine</b>                 | N*=31       |
| WBC count (G/L)                      |             |
| Median                               | 4.5         |
| Interquartile range                  | 4.12-6.34   |
| Subgroup — no. (%)                   |             |
| <3.5                                 | 4(12.9)     |
| 3.5-9.5                              | 27(87.1)    |
| >9.5                                 | 0           |
| Neutrophil count (G/L)               |             |
| Median                               | 2.95        |
| Interquartile range                  | 2.17-4.31   |
| Subgroup — no. (%)                   |             |
| <1.8                                 | 5(16.1)     |
| 1.8-6.3                              | 25(80.6)    |
| >6.3                                 | 1(3.2)      |
| Lymphocyte count (G/L)               |             |
| Median                               | 1.13        |
| Interquartile range                  | 0.815-1.515 |
| Subgroup — no. (%)                   |             |
| <1.1                                 | 13(43.3)    |
| 1.1-3.2                              | 17(56.7)    |
| >3.2                                 | 0           |
| Hemoglobin (g/L)                     |             |
| Median                               | 136         |
| Interquartile range                  | 125.5-151   |
| Platelet count (G/L)                 |             |
| Median                               | 170         |
| Interquartile range                  | 148.5-202.5 |
| Subgroup — no. (%)                   |             |
| <125                                 | 2(6.9)      |
| 125-350                              | 27(93.1)    |
| >350                                 | 0           |
| <b>Blood biochemistry</b>            | N=26        |
| Alanine aminotransferase (U/L)       |             |
| Median                               | 18          |
| Interquartile range                  | 13-28.5     |
| Subgroup — no. (%)                   |             |
| ≤ 40                                 | 22(84.6)    |
| > 40                                 | 4(15.4)     |
| Aspartate aminotransferase (U/L)     |             |

|                                     |             |
|-------------------------------------|-------------|
| Median                              | 22.5        |
| Interquartile range                 | 19-28       |
| Subgroup — no. (%)                  |             |
| ≤ 40                                | 25(96.2)    |
| > 40                                | 1(3.8)      |
| Albumin (g/L)                       |             |
| Median                              | 41.6        |
| Interquartile range                 | 38.6-44.125 |
| Total bilirubin (μmol/L)            |             |
| Median                              | 8.75        |
| Interquartile range                 | 6.9-10.1    |
| Direct bilirubin(μmol/L)            |             |
| Median                              | 3.4         |
| Interquartile range                 | 2.225-4     |
| Creatinine (μmol/L)                 |             |
| Median                              | 64.65       |
| Interquartile range                 | 55.6-77.85  |
| Subgroup — no. (%)                  |             |
| ≤133                                | 26(100)     |
| > 133                               | 0           |
| Blood urea nitrogen (mmol/L)        |             |
| Median                              | 3.76        |
| Interquartile range                 | 2.85-4.23   |
| Creatine kinase (U/L)               |             |
| Median                              | 55.5        |
| Interquartile range                 | 45-88.75    |
| Subgroup — no. (%)                  |             |
| ≤174                                | 23(95.8)    |
| > 174                               | 1(4.2)      |
| Lactate dehydrogenase (U/L)         |             |
| Median                              | 187         |
| Interquartile range                 | 165-262     |
| Subgroup — no. (%)                  |             |
| ≤245                                | 16(69.6)    |
| > 245                               | 7(30.4)     |
| <b>Infection-related biomarkers</b> | N=22        |
| C-reactive protein(mg/L)            |             |
| Subgroup — no. (%)                  |             |
| < 8                                 | 11(50)      |
| ≥8                                  | 11(50)      |

---

|                                                          |           |
|----------------------------------------------------------|-----------|
| Procalcitonin (µg/ml)                                    |           |
| Subgroup — no. (%)                                       |           |
| < 0.5                                                    | 21(95.5)  |
| ≥0.5                                                     | 1(4.5)    |
| Erythrocyte sedimentation rate(mm/h)                     |           |
| Median                                                   | 10.5      |
| Interquartile range                                      | 6-23.5    |
| Interleukin-6(pg/ml)                                     |           |
| Median                                                   | 4.68      |
| Interquartile range                                      | 3.06-7.17 |
| <b>Chest x-ray and CT findings on admission— no. (%)</b> |           |
| Ground-glass opacity (GGO) dominating                    | 29(82.9)  |
| Consolidation dominating                                 | 4(11.4)   |
| GGO and consolidation integrating                        | 1(2.9)    |
| Normal                                                   | 1(2.9)    |

---

\*N represents the number of included patients.

Blood routine:

WBC count (G/L) Normal Range: 3.5-9.5

Neutrophil count (G/L) Normal Range: 1.8-6.3

Lymphocyte count (G/L) Normal Range: 1.1-3.2

Hemoglobin (g/L) Normal Range: 130-175

Platelet count (G/L) Normal Range: 125-350

Blood biochemistry:

Alanine aminotransferase (U/L) Normal Range: 5-40

Aspartate aminotransferase (U/L) Normal Range: 8-40

Albumin (g/L) Normal Range: 35-55

Total bilirubin (µmol/L) Normal Range: 5.1-19

Direct bilirubin(µmol/L) Normal Range: 1.7-6.8

Creatinine (µmol/L) Normal Range: 44-133

Blood urea nitrogen (mmol/L) Normal Range: 2.9-8.2

Creatine kinase (U/L) Normal Range: 38-174

Lactate dehydrogenase (U/L) Normal Range: 109-245

Infection-related biomarkers

C-reactive protein(mg/L) Normal Range: < 8

Procalcitonin (µg/ml) Normal Range: < 0.5

Erythrocyte sedimentation rate(mm/h) Normal Range: < 20

Interleukin-6(pg/ml) Normal Range: 0.1-2.9

**Table S3 Corresponding sequencing sample ids and patient ids**

| Sample ID   | Patient ID |
|-------------|------------|
| WHUHnCoV001 | J          |
| WHUHnCoV002 | Q          |
| WHUHnCoV003 | H          |
| WHUHnCoV004 | M          |
| WHUHnCoV005 | C          |
| WHUHnCoV006 | F          |
| WHUHnCoV007 | E          |
| WHUHnCoV008 | R          |
| WHUHnCoV011 | B          |
| WHUHnCoV012 | G          |
| WHUHnCoV020 | e          |
| WHUHnCoV021 | V          |

**Table S4 The detailed mutation information of our 12 samples.**

| Sample ID   | Pos   | Ref | Alt |
|-------------|-------|-----|-----|
| WHUHnCoV001 | 2536  | C   | T   |
| WHUHnCoV001 | 8782  | C   | T   |
| WHUHnCoV001 | 8886  | T   | C   |
| WHUHnCoV001 | 28144 | T   | C   |
| WHUHnCoV002 | 2536  | C   | T   |
| WHUHnCoV002 | 8782  | C   | T   |
| WHUHnCoV002 | 8886  | T   | C   |
| WHUHnCoV002 | 28144 | T   | C   |
| WHUHnCoV003 | 8782  | C   | T   |
| WHUHnCoV003 | 18996 | T   | C   |
| WHUHnCoV003 | 24370 | C   | T   |
| WHUHnCoV003 | 28144 | T   | C   |
| WHUHnCoV003 | 29029 | T   | C   |
| WHUHnCoV004 | 2536  | C   | T   |
| WHUHnCoV004 | 8782  | C   | T   |
| WHUHnCoV004 | 8886  | T   | C   |
| WHUHnCoV004 | 28144 | T   | C   |
| WHUHnCoV005 | 8782  | C   | T   |
| WHUHnCoV005 | 10626 | C   | T   |
| WHUHnCoV005 | 28144 | T   | C   |
| WHUHnCoV006 | 8782  | C   | T   |
| WHUHnCoV006 | 28144 | T   | C   |
| WHUHnCoV007 | 8782  | C   | T   |
| WHUHnCoV007 | 16325 | G   | C   |
| WHUHnCoV007 | 28144 | T   | C   |
| WHUHnCoV008 | 2536  | C   | T   |
| WHUHnCoV008 | 8782  | C   | T   |
| WHUHnCoV008 | 8886  | T   | C   |
| WHUHnCoV008 | 28144 | T   | C   |
| WHUHnCoV011 | 8782  | C   | T   |
| WHUHnCoV011 | 28144 | T   | C   |
| WHUHnCoV012 | 8782  | C   | T   |
| WHUHnCoV012 | 28144 | T   | C   |
| WHUHnCoV020 | 2536  | C   | T   |
| WHUHnCoV020 | 8782  | C   | T   |
| WHUHnCoV020 | 8886  | T   | C   |
| WHUHnCoV020 | 28144 | T   | C   |
| WHUHnCoV021 | 17249 | C   | T   |
| WHUHnCoV021 | 17894 | C   | T   |

The reference genomes we used was Wuhan-Hu-1 (GenBank accession number, NC\_045512.2)

**Table S5 The integrated introduction of all 61 published 2019-nCoV**

| Strain                 | Gisaid_epi_isl     | Genbank_accession | Date      | Country | Location    | Segment | Host  | Originating_lab                                          | Submitting_lab                                                                                                                           | Authors      |
|------------------------|--------------------|-------------------|-----------|---------|-------------|---------|-------|----------------------------------------------------------|------------------------------------------------------------------------------------------------------------------------------------------|--------------|
| 2019-nCoV WHU01        | EPI_ISL_40671<br>6 | MN988668          | 2020/1/2  | China   | Wuhan       | genome  | human | State Key Laboratory of Virology, Wuhan University       | State Key Laboratory of Virology, Wuhan University                                                                                       | Chen et al   |
| 2019-nCoV WHU02        | EPI_ISL_40671<br>7 | MN988669          | 2020/1/2  | China   | Wuhan       | genome  | human | State Key Laboratory of Virology, Wuhan University       | State Key Laboratory of Virology, Wuhan University                                                                                       | Chen et al   |
| 2019-nCoV/USA-AZ1/2020 | EPI_ISL_40622<br>3 | MN997409          | 2020/1/22 | USA     | Phoenix     | genome  | human | Arizona Department of Health Services, Phoenix, AZ, USA  | Pathogen Discovery, Respiratory Viruses Branch, Division of Viral Diseases, Centers for Disease Control and Prevention, Atlanta, GA, USA | Tao et al    |
| 2019-nCoV/USA-CA1/2020 | EPI_ISL_40603<br>4 | MN994467          | 2020/1/23 | USA     | Los Angeles | genome  | human | California Department of Public Health, Richmond CA, USA | Pathogen Discovery, Respiratory Viruses Branch, Division of Viral Diseases, Centers for Diseases Control and Prevention, Atlanta GA, USA | Uehara et al |
| 2019-nCoV/USA-CA2/2020 | EPI_ISL_40603      | MN994468          | 2020/1/22 | USA     | Orange      | genome  | human | California                                               | Pathogen Discovery,                                                                                                                      | Uehara       |

|                              |                |          |            |           |          |        |       |                                                                |                                                                                                                                      |             |
|------------------------------|----------------|----------|------------|-----------|----------|--------|-------|----------------------------------------------------------------|--------------------------------------------------------------------------------------------------------------------------------------|-------------|
|                              | 6              |          |            |           | County   |        | n     | Department of Public Health, Richmond CA, USA                  | Respiratory Viruses Branch, Division of Viral Diseases, Centers for Diseases Control and Prevention, Atlanta GA, USA                 | et al       |
| 2019-nCoV/USA-IL1/2020       | EPI_ISL_404253 | MN988713 | 2020/1/21  | USA       | Chicago  | genome | human | IL Department of Public Health Chicago Laboratory, Chicago, IL | Pathogen Discovery, Respiratory Viruses Branch, Division of Viral Diseases, Centers for Diseases Control and Prevention, Atlanta, GA | Tao et al   |
| 2019-nCoV/USA-WA1/2020       | EPI_ISL_404895 | MN985325 | 2020/1/19  | USA       | Seattle  | genome | human | Providence Regional Medical Center                             | Division of Viral Diseases, Centers for Disease Control and Prevention                                                               | Queen et al |
| 2019-nCoV_HKU-SZ-002a_2020   | EPI_ISL_406030 | MN938384 | 2020/01/XX | China     | Shenzhen | genome | human | University of Hong Kong-Shenzhen Hospital                      | University of Hong Kong-Shenzhen Hospital                                                                                            | Chan et al  |
| 2019-nCoV_HKU-SZ-005b_2020   | EPI_ISL_405839 | MN975262 | 2020/01/XX | China     | Shenzhen | genome | human | University of Hong Kong-Shenzhen Hospital                      | University of Hong Kong-Shenzhen Hospital                                                                                            | Chan et al  |
| BetaCoV/Australia/NSW01/2020 | EPI_ISL_407893 | /        | 2020/1/24  | Australia | Sydney   | genome | human | Centre for Infectious Diseases and Microbiology Laboratory     | NSW Health Pathology - Institute of Clinical Pathology and Medical Research; Westmead                                                | Eden et al  |



|                              |                |          |           |                |           |        |       |                                                                                                        |                                                                                                                                                                                              |               |
|------------------------------|----------------|----------|-----------|----------------|-----------|--------|-------|--------------------------------------------------------------------------------------------------------|----------------------------------------------------------------------------------------------------------------------------------------------------------------------------------------------|---------------|
|                              |                |          |           |                |           |        |       | Services, Westmead, Australia                                                                          | Hospital; University of Sydney, Westmead, Australia                                                                                                                                          |               |
| BetaCoV/Australia/VIC01/2020 | EPI_ISL_406844 | /        | 2020/1/25 | Australia      | Clayton   | genome | human | Monash Medical Centre, Melbourne, Australia                                                            | Collaboration between the University of Melbourne at The Peter Doherty Institute for Infection and Immunity, and the Victorian Infectious Disease Reference Laboratory, Melbourne, Australia | Caly et al    |
| BetaCoV/England/01/2020      | EPI_ISL_407071 | /        | 2020/1/29 | United Kingdom | England   | genome | human | Respiratory Virus Unit, Microbiology Services Colindale, Public Health England, London, United Kingdom | Respiratory Virus Unit, Microbiology Services Colindale, Public Health England, London, United Kingdom                                                                                       | Galiano et al |
| BetaCoV/England/02/2020      | EPI_ISL_407073 | /        | 2020/1/29 | United Kingdom | England   | genome | human | Respiratory Virus Unit, Microbiology Services Colindale, Public Health England, London, United Kingdom | Respiratory Virus Unit, Microbiology Services Colindale, Public Health England, London, United Kingdom                                                                                       | Galiano et al |
| BetaCoV/Finland/1/2020       | EPI_ISL_407079 | MT020781 | 2020/1/29 | Finland        | Rovaniemi | genome | human | Lapland Central Hospital, Finland                                                                      | Department of Virology, University of Helsinki                                                                                                                                               | Smura et al   |

|                             |                    |   |           |        |        |        |       |                                                                                               |                                                                                                  |              |
|-----------------------------|--------------------|---|-----------|--------|--------|--------|-------|-----------------------------------------------------------------------------------------------|--------------------------------------------------------------------------------------------------|--------------|
|                             |                    |   |           |        |        |        |       |                                                                                               | and Helsinki University Hospital, Helsinki, Finland                                              |              |
| BetaCoV/Foshan/20SF207/2020 | EPI_ISL_40653<br>4 | / | 2020/1/22 | China  | Foshan | genome | human | Guangdong Provincial Institute of Public Health, Guangzhou, China                             | Guangdong Provincial Center for Diseases Control and Prevention, Guangzhou, China                | Kang et al   |
| BetaCoV/Foshan/20SF210/2020 | EPI_ISL_40653<br>5 | / | 2020/1/22 | China  | Foshan | genome | human | Guangdong Provincial Institute of Public Health, Guangzhou, China                             | Guangdong Provincial Center for Diseases Control and Prevention, Guangzhou, China                | Kang et al   |
| BetaCoV/Foshan/20SF211/2020 | EPI_ISL_40653<br>6 | / | 2020/1/22 | China  | Foshan | genome | human | Guangdong Provincial Institute of Public Health, Guangzhou, China                             | Guangdong Provincial Center for Diseases Control and Prevention, Guangzhou, China                | Kang et al   |
| BetaCoV/France/IDF0372/2020 | EPI_ISL_40659<br>6 | / | 2020/1/23 | France | Paris  | genome | human | Department of Infectious and Tropical Diseases, Bichat Claude Bernard Hospital, Paris, France | National Reference Center for Viruses of Respiratory Infections, Institut Pasteur, Paris, France | Albert et al |
| BetaCoV/France/IDF0373/2020 | EPI_ISL_40659<br>7 | / | 2020/1/23 | France | Paris  | genome | human | Department of Infectious and Tropical Diseases, Bichat Claude Bernard Hospital,               | National Reference Center for Viruses of Respiratory Infections, Institut Pasteur, Paris, France | Albert et al |

|                                |                    |   |           |         |           |        |       |                                                                                                                                            |                                                                                                                                                                        |                 |
|--------------------------------|--------------------|---|-----------|---------|-----------|--------|-------|--------------------------------------------------------------------------------------------------------------------------------------------|------------------------------------------------------------------------------------------------------------------------------------------------------------------------|-----------------|
|                                |                    |   |           |         |           |        |       | Paris, France                                                                                                                              |                                                                                                                                                                        |                 |
| BetaCoV/Germany/BavPat1/2020   | EPI_ISL_40686<br>2 | / | 2020/1/28 | Germany | Starnberg | genome | human | Charite<br>Universitaetsmedizi<br>n Berlin, Institute of<br>Virology; Institut<br>fuer Mikrobiologie<br>der Bundeswehr,<br>Munich, Germany | Charite<br>Universitaetsmedizin<br>Berlin, Institute of<br>Virology, Berlin,<br>Germany                                                                                | Corman<br>et al |
| BetaCoV/Guangdong/20SF012/2020 | EPI_ISL_40393<br>2 | / | 2020/1/14 | China   | Shenzhen  | genome | human | Guangdong<br>Provincial Center<br>for Diseases Control<br>and Prevention;<br>Guangdong<br>Provincial Public<br>Health, Guangzhou,<br>China | Department of<br>Microbiology,<br>Guangdong Provincial<br>Center for Diseases<br>Control and Prevention;<br>Guangdong Provincial<br>Public Health,<br>Guangzhou, China | Kang et<br>al   |
| BetaCoV/Guangdong/20SF013/2020 | EPI_ISL_40393<br>3 | / | 2020/1/15 | China   | Shenzhen  | genome | human | Guangdong<br>Provincial Center<br>for Diseases Control<br>and Prevention;<br>Guangdong<br>Provincial Public<br>Health, Guangzhou,<br>China | Department of<br>Microbiology,<br>Guangdong Provincial<br>Center for Diseases<br>Control and Prevention;<br>Guangdong Provincial<br>Public Health,<br>Guangzhou, China | Kang et<br>al   |
| BetaCoV/Guangdong/20SF014/2020 | EPI_ISL_40393<br>4 | / | 2020/1/15 | China   | Shenzhen  | genome | human | Guangdong<br>Provincial Center                                                                                                             | Department of<br>Microbiology,                                                                                                                                         | Kang et<br>al   |

|                                |                    |   |           |       |          |        |       |                                                                                                                       |                                                                                                                                                   |            |
|--------------------------------|--------------------|---|-----------|-------|----------|--------|-------|-----------------------------------------------------------------------------------------------------------------------|---------------------------------------------------------------------------------------------------------------------------------------------------|------------|
|                                |                    |   |           |       |          |        |       | for Diseases Control and Prevention; Guangdong Provincial Public Health, Guangzhou, China                             | Guangdong Provincial Center for Diseases Control and Prevention; Guangdong Provincial Public Health, Guangzhou, China                             |            |
| BetaCoV/Guangdong/20SF025/2020 | EPI_ISL_40393<br>5 | / | 2020/1/15 | China | Shenzhen | genome | human | Guangdong Provincial Center for Diseases Control and Prevention; Guangdong Provincial Public Health, Guangzhou, China | Department of Microbiology, Guangdong Provincial Center for Diseases Control and Prevention; Guangdong Provincial Public Health, Guangzhou, China | Kang et al |
| BetaCoV/Guangdong/20SF028/2020 | EPI_ISL_40393<br>6 | / | 2020/1/17 | China | Zhuhai   | genome | human | Guangdong Provincial Center for Diseases Control and Prevention; Guangdong Provincial Public Health, Guangzhou, China | Department of Microbiology, Guangdong Provincial Center for Diseases Control and Prevention; Guangdong Provincial Public Health, Guangzhou, China | Kang et al |
| BetaCoV/Guangdong/20SF040/2020 | EPI_ISL_40393<br>7 | / | 2020/1/18 | China | Zhuhai   | genome | human | Guangdong Provincial Center for Diseases Control and Prevention;                                                      | Department of Microbiology, Guangdong Provincial Center for Diseases                                                                              | Kang et al |

|                                 |                |          |           |             |           |        |       |                                                                                     |                                                                                   |                |
|---------------------------------|----------------|----------|-----------|-------------|-----------|--------|-------|-------------------------------------------------------------------------------------|-----------------------------------------------------------------------------------|----------------|
|                                 |                |          |           |             |           |        |       | Guangdong Provincial Public Health, Guangzhou, China                                | Control and Prevention; Guangdong Provincial Public Health, Guangzhou, China      |                |
| BetaCoV/Guangdong/20SF174/2020  | EPI_ISL_406531 | /        | 2020/1/22 | China       | Zhuhai    | genome | human | Guangdong Provincial Institute of Public Health, Guangzhou, China                   | Guangdong Provincial Center for Diseases Control and Prevention, Guangzhou, China | Kang et al     |
| BetaCoV/Guangdong/20SF201/2020  | EPI_ISL_406538 | /        | 2020/1/23 | China       | Guangdong | genome | human | Guangdong Provincial Institute of Public Health, Guangzhou, China                   | Guangdong Provincial Center for Diseases Control and Prevention, Guangzhou, China | Kang et al     |
| BetaCoV/Guangzhou/20SF206/2020  | EPI_ISL_406533 | /        | 2020/1/22 | China       | Guangzhou | genome | human | Guangdong Provincial Institute of Public Health, Guangzhou, China                   | Guangdong Provincial Center for Diseases Control and Prevention, Guangzhou, China | Kang et al     |
| BetaCoV/Hangzhou/HZCDC0001/2020 | EPI_ISL_407313 | /        | 2020/1/19 | China       | Hangzhou  | genome | human | Hangzhou Center for Disease Control and Prevention                                  | Hangzhou Center for Disease Control and Prevention                                | /              |
| BetaCoV/Japan/A1/I-004/2020     | EPI_ISL_407084 | LC521925 | 2020/1/25 | Japan       | Aichi     | genome | human | Department of Virology III, National Institute of Infectious Diseases, Tokyo, Japan | Pathogen Genomics Center, National Institute of Infectious Diseases, Tokyo, Japan | Sekizuka et al |
| BetaCoV/Korea/KCDC03/2020       | EPI_ISL_407193 | /        | 2020/1/25 | South Korea | Gyeonggi  | genome | human | Korea Centers for Disease Control &                                                 | Korea Centers for Disease Control &                                               | Kim et al      |

|                                |                    |   |           |          |          |        |           |                                                                                                                                        |                                                                                                                                               |                   |
|--------------------------------|--------------------|---|-----------|----------|----------|--------|-----------|----------------------------------------------------------------------------------------------------------------------------------------|-----------------------------------------------------------------------------------------------------------------------------------------------|-------------------|
|                                |                    |   |           |          |          |        |           | Prevention (KCDC),<br>Center for<br>Laboratory Control<br>of Infectious<br>Diseases, Division<br>of Viral Diseases,<br>Cheongju, Korea | Prevention (KCDC),<br>Center for Laboratory<br>Control of Infectious<br>Diseases, Division of<br>Viral Diseases,<br>Cheongju, Korea           |                   |
| BetaCoV/Nonthaburi/61/2020     | EPI_ISL_40396<br>2 | / | 2020/1/8  | Thailand | Bangkok  | genome | huma<br>n | Bamrasnaradura<br>Hospital,<br>Nonthaburi,<br>Thailand                                                                                 | Department of Medical<br>Sciences, National<br>Institute of Health,<br>Nonthaburi, Thailand                                                   | Pilailuk<br>et al |
| BetaCoV/Nonthaburi/74/2020     | EPI_ISL_40396<br>3 | / | 2020/1/13 | Thailand | Bangkok  | genome | huma<br>n | Bamrasnaradura<br>Hospital,<br>Nonthaburi,<br>Thailand                                                                                 | Department of Medical<br>Sciences, National<br>Institute of Health,<br>Nonthaburi, Thailand                                                   | Pilailuk<br>et al |
| BetaCoV/Shenzhen/SZTH-001/2020 | EPI_ISL_40659<br>2 | / | 2020/1/13 | China    | Shenzhen | genome | huma<br>n | Shenzhen Third<br>People's Hospital,<br>Shenzhen, China                                                                                | Shenzhen Key<br>Laboratory of Pathogen<br>and Immunity, National<br>Clinical Research<br>Center for Infectious<br>Disease, Shenzhen,<br>China | Yang et<br>al     |
| BetaCoV/Shenzhen/SZTH-002/2020 | EPI_ISL_40659<br>3 | / | 2020/1/13 | China    | Shenzhen | genome | huma<br>n | Shenzhen Third<br>People's Hospital,<br>Shenzhen, China                                                                                | Shenzhen Key<br>Laboratory of Pathogen<br>and Immunity, National<br>Clinical Research                                                         | Yang et<br>al     |

|                                |                |          |           |           |           |        |       |                                                     |                                                                                                                             |            |
|--------------------------------|----------------|----------|-----------|-----------|-----------|--------|-------|-----------------------------------------------------|-----------------------------------------------------------------------------------------------------------------------------|------------|
|                                |                |          |           |           |           |        |       |                                                     | Center for Infectious Disease, Shenzhen, China                                                                              |            |
| BetaCoV/Shenzhen/SZTH-003/2020 | EPI_ISL_406594 | /        | 2020/1/16 | China     | Shenzhen  | genome | human | Shenzhen Third People's Hospital, Shenzhen, China   | Shenzhen Key Laboratory of Pathogen and Immunity, National Clinical Research Center for Infectious Disease, Shenzhen, China | Yang et al |
| BetaCoV/Shenzhen/SZTH-004/2020 | EPI_ISL_406595 | /        | 2020/1/16 | China     | Shenzhen  | genome | human | Shenzhen Third People's Hospital, Shenzhen, China   | Shenzhen Key Laboratory of Pathogen and Immunity, National Clinical Research Center for Infectious Disease, Shenzhen, China | Yang et al |
| BetaCoV/Singapore/1/2020       | EPI_ISL_406973 | /        | 2020/1/23 | Singapore | Singapore | genome | human | Singapore General Hospital, Singapore               | National Public Health Laboratory, Singapore                                                                                | Mak et al  |
| BetaCoV/Taiwan/2/2020          | EPI_ISL_406031 | /        | 2020/1/23 | Taiwan    | Kaohsiung | genome | human | Centers for Disease Control, R.O.C., Taipei, Taiwan | Centers for Disease Control, R.O.C., Taipei, Taiwan                                                                         | Yang et al |
| BetaCoV/USA/WA1-A12/2020       | EPI_ISL_407214 | MT020880 | 2020/1/25 | USA       | /         | genome | human | WA State Department of Health                       | Pathogen Discovery, Respiratory Viruses Branch, Division of Viral Diseases, Centers                                         | /          |

|                                  |                |          |            |       |       |        |       |                                                                                                                   |                                                                                                                         |             |
|----------------------------------|----------------|----------|------------|-------|-------|--------|-------|-------------------------------------------------------------------------------------------------------------------|-------------------------------------------------------------------------------------------------------------------------|-------------|
|                                  |                |          |            |       |       |        |       |                                                                                                                   | for Diseases Control and Prevention                                                                                     |             |
| BetaCoV/USA/WA1-F6/2020          | EPI_ISL_407215 | MT020881 | 2020/1/25  | USA   | /     | genome | human | WA State Department of Health                                                                                     | Pathogen Discovery, Respiratory Viruses Branch, Division of Viral Diseases, Centers for Diseases Control and Prevention | /           |
| BetaCoV/Wuhan/HBCDC-HB-01/2019   | EPI_ISL_402132 | /        | 2019/12/30 | China | Wuhan | genome | human | Wuhan Jinyintan Hospital, Wuhan, China                                                                            | Hubei Provincial Center for Disease Control and Prevention, Wuhan, China                                                | Fang et al  |
| BetaCoV/Wuhan/IPBCAMS-WH-01/2019 | EPI_ISL_402123 | MT019529 | 2019/12/23 | China | Wuhan | genome | human | Institute of Pathogen Biology, Chinese Academy of Medical Sciences & Peking Union Medical College, Beijing, China | Institute of Pathogen Biology, Chinese Academy of Medical Sciences & Peking Union Medical College, Beijing, China       | Ren et al   |
| BetaCoV/Wuhan/IPBCAMS-WH-02/2019 | EPI_ISL_403931 | MT019530 | 2020/2/4   | China | Wuhan | genome | human | NHC Key Laboratory of Systems Biology of Pathogens and Christophe Merieux Laboratory                              | National Genomics Data Center                                                                                           | Ren,L et al |
| BetaCoV/Wuhan/IPBCAMS-WH-        | EPI_ISL_40393  | MT019531 | 2019/12/30 | China | Wuhan | genome | huma  | Institute of                                                                                                      | Institute of Pathogen                                                                                                   | Ren et al   |



|                                  |                |          |            |       |       |        |       |                                                                                                                   |                                                                                                                   |             |
|----------------------------------|----------------|----------|------------|-------|-------|--------|-------|-------------------------------------------------------------------------------------------------------------------|-------------------------------------------------------------------------------------------------------------------|-------------|
| 03/2019                          | 0              |          |            |       |       |        | n     | Pathogen Biology, Chinese Academy of Medical Sciences & Peking Union Medical College, Beijing, China              | Biology, Chinese Academy of Medical Sciences & Peking Union Medical College, Beijing, China                       |             |
| BetaCoV/Wuhan/IPBCAMS-WH-04/2019 | EPI_ISL_403929 | MT019532 | 2019/12/30 | China | Wuhan | genome | human | Institute of Pathogen Biology, Chinese Academy of Medical Sciences & Peking Union Medical College, Beijing, China | Institute of Pathogen Biology, Chinese Academy of Medical Sciences & Peking Union Medical College, Beijing, China | Ren et al   |
| BetaCoV/Wuhan/IPBCAMS-WH-05/2020 | EPI_ISL_403928 | MT019533 | 2020/2/4   | China | Wuhan | genome | human | NHC Key Laboratory of Systems Biology of Pathogens and Christophe Merieux Laboratory                              | National Genomics Data Center                                                                                     | Ren,L et al |
| BetaCoV/Wuhan/IVDC-HB-01/2019    | EPI_ISL_402119 | /        | 2019/12/30 | China | Wuhan | genome | human | National Institute for Viral Disease Control and Prevention, China CDC, Beijing, China                            | National Institute for Viral Disease Control and Prevention, China CDC, Beijing, China                            | Tan et al   |
| BetaCoV/Wuhan/WH-01/2019         | EPI_ISL_40679  | /        | 2019/12/26 | China | Wuhan | genome | human | General Hospital of                                                                                               | BGI & Institute of                                                                                                | Chen et     |

|                             |                    |   |           |       |          |        |           |                                                                                                               |                                                                                                                                                           |               |
|-----------------------------|--------------------|---|-----------|-------|----------|--------|-----------|---------------------------------------------------------------------------------------------------------------|-----------------------------------------------------------------------------------------------------------------------------------------------------------|---------------|
|                             | 8                  |   |           |       |          |        | n         | Central Theater<br>Command of<br>People's Liberation<br>Army of China,<br>Wuhan, China                        | Microbiology, Chinese<br>Academy of Sciences &<br>Shandong First Medical<br>University & Shandong<br>Academy of Medical<br>Sciences                       | al            |
| BetaCoV/Wuhan/WH-03/2019    | EPI_ISL_40680<br>0 | / | 2020/1/1  | China | Wuhan    | genome | huma<br>n | General Hospital of<br>Central Theater<br>Command of<br>People's Liberation<br>Army of China,<br>Wuhan, China | BGI & Institute of<br>Microbiology, Chinese<br>Academy of Sciences &<br>Shandong First Medical<br>University & Shandong<br>Academy of Medical<br>Sciences | Chen et<br>al |
| BetaCoV/Wuhan/WH-04/2019    | EPI_ISL_40680<br>1 | / | 2020/1/5  | China | Wuhan    | genome | huma<br>n | General Hospital of<br>Central Theater<br>Command of<br>People's Liberation<br>Army of China,<br>Wuhan, China | BGI & Institute of<br>Microbiology, Chinese<br>Academy of Sciences &<br>Shandong First Medical<br>University & Shandong<br>Academy of Medical<br>Sciences | Chen et<br>al |
| BetaCoV/Zhejiang/WZ-01/2020 | EPI_ISL_40422<br>7 | / | 2020/1/16 | China | Hangzhou | genome | huma<br>n | Zhejiang Provincial<br>Center for Disease<br>Control and<br>Prevention,<br>Hangzhou, China                    | Department of<br>Microbiology, Zhejiang<br>Provincial Center for<br>Disease Control and<br>Prevention, Hangzhou,<br>China                                 | Chen et<br>al |

|                             |                |          |            |       |          |        |       |                                                                                |                                                                                                            |             |
|-----------------------------|----------------|----------|------------|-------|----------|--------|-------|--------------------------------------------------------------------------------|------------------------------------------------------------------------------------------------------------|-------------|
| BetaCoV/Zhejiang/WZ-02/2020 | EPI_ISL_404228 | /        | 2020/1/17  | China | Hangzhou | genome | human | Zhejiang Provincial Center for Disease Control and Prevention, Hangzhou, China | Department of Microbiology, Zhejiang Provincial Center for Disease Control and Prevention, Hangzhou, China | Zhang et al |
| Wuhan/WIV02/2019            | EPI_ISL_402127 | MN996527 | 2019/12/30 | China | Wuhan    | genome | human | Wuhan Jinyintan Hospital, Wuhan, China                                         | Wuhan Institute of Virology, Chinese Academy of Sciences, Wuhan, China                                     | Zhou et al  |
| Wuhan/WIV04/2019            | EPI_ISL_402124 | MN996528 | 2019/12/30 | China | Wuhan    | genome | human | Wuhan Jinyintan Hospital, Wuhan, China                                         | Wuhan Institute of Virology, Chinese Academy of Sciences, Wuhan, China                                     | Zhou et al  |
| Wuhan/WIV05/2019            | EPI_ISL_402128 | MN996529 | 2019/12/30 | China | Wuhan    | genome | human | Wuhan Jinyintan Hospital, Wuhan, China                                         | Wuhan Institute of Virology, Chinese Academy of Sciences, Wuhan, China                                     | Zhou et al  |
| Wuhan/WIV06/2019            | EPI_ISL_402129 | MN996530 | 2019/12/30 | China | Wuhan    | genome | human | Wuhan Jinyintan Hospital, Wuhan, China                                         | Wuhan Institute of Virology, Chinese Academy of Sciences, Wuhan, China                                     | Zhou et al  |
| Wuhan/WIV07/2019            | EPI_ISL_402130 | MN996531 | 2019/12/30 | China | Wuhan    | genome | human | Wuhan Jinyintan Hospital, Wuhan, China                                         | Wuhan Institute of Virology, Chinese Academy of Sciences, Wuhan, China                                     | Zhou et al  |

|                          |                |          |            |       |          |        |       |                                                                           |                                                                                                      |             |
|--------------------------|----------------|----------|------------|-------|----------|--------|-------|---------------------------------------------------------------------------|------------------------------------------------------------------------------------------------------|-------------|
| Wuhan-Hu-1/2019          | EPI_ISL_402125 | MN908947 | 2019/12/26 | China | Wuhan    | genome | human | unknown                                                                   | National Institute for Communicable Disease Control and Prevention (ICDC), China CDC, Beijing, China | Zhang et al |
| Zhejiang/Hangzhou-1/2020 | EPI_ISL_406970 | MT039873 | 2020/1/20  | China | Hangzhou | genome | human | Hangzhou Center for Disease and Control Microbiology Lab, Zhejiang, China | Hangzhou Center for Disease and Control Microbiology Lab, Zhejiang, China                            | Hua et al   |

**Table S6 The integrated mutation information of all 67 published 2019-nCoV**

| Gisaid_epi_isl | Pos   | Ref | Alt |
|----------------|-------|-----|-----|
| EPI_ISL_402123 | 3778  | A   | G   |
| EPI_ISL_402123 | 8388  | A   | G   |
| EPI_ISL_402123 | 8987  | T   | A   |
| EPI_ISL_402127 | 21316 | G   | A   |
| EPI_ISL_402127 | 24325 | A   | G   |
| EPI_ISL_402128 | 7016  | G   | A   |
| EPI_ISL_402128 | 21137 | A   | G   |
| EPI_ISL_402130 | 8001  | A   | C   |
| EPI_ISL_402130 | 9534  | C   | T   |
| EPI_ISL_402132 | 21656 | T   | A   |
| EPI_ISL_403930 | 6996  | T   | C   |
| EPI_ISL_403932 | 8782  | C   | T   |
| EPI_ISL_403932 | 28144 | T   | C   |
| EPI_ISL_403932 | 29095 | C   | T   |
| EPI_ISL_403933 | 8782  | C   | T   |
| EPI_ISL_403933 | 28144 | T   | C   |
| EPI_ISL_403933 | 29095 | C   | T   |
| EPI_ISL_403934 | 23569 | T   | C   |
| EPI_ISL_403935 | 8782  | C   | T   |
| EPI_ISL_403935 | 28144 | T   | C   |
| EPI_ISL_403935 | 29095 | C   | T   |
| EPI_ISL_403936 | 21707 | C   | T   |

|                |       |                |                |
|----------------|-------|----------------|----------------|
| EPI_ISL_403937 | 21707 | C              | T              |
| EPI_ISL_404227 | 31    | A              | G              |
| EPI_ISL_404227 | 583   | C              | T              |
| EPI_ISL_406030 | 8782  | C              | T              |
| EPI_ISL_406030 | 28144 | T              | C              |
| EPI_ISL_406030 | 29095 | C              | T              |
| EPI_ISL_406031 | 16188 | G              | T              |
| EPI_ISL_406031 | 25964 | A              | G              |
| EPI_ISL_406031 | 26144 | G              | T              |
| EPI_ISL_406031 | 29877 | A              | T              |
| EPI_ISL_406531 | 21707 | C              | T              |
| EPI_ISL_406533 | 15324 | C              | T              |
| EPI_ISL_406533 | 29303 | C              | T              |
| EPI_ISL_406534 | 28291 | C              | T              |
| EPI_ISL_406534 | 28854 | C              | T              |
| EPI_ISL_406535 | 17373 | C              | T              |
| EPI_ISL_406536 | 17373 | C              | T              |
| EPI_ISL_406592 | 1648  | C              | T              |
| EPI_ISL_406592 | 2169  | T              | C              |
| EPI_ISL_406592 | 3801  | A              | C              |
| EPI_ISL_406592 | 4643  | GAAGAAGCTGCTCG | GGAGAAGCTGCTCC |
| EPI_ISL_406592 | 4727  | GGTTATCTTACTT  | GTATACTTACTC   |
| EPI_ISL_406592 | 5464  | T              | C              |
| EPI_ISL_406592 | 6308  | A              | G              |
| EPI_ISL_406592 | 6786  | C              | G              |

|                |       |                                  |                                  |
|----------------|-------|----------------------------------|----------------------------------|
| EPI_ISL_406592 | 6833  | ATTAAA                           | AGTAAG                           |
| EPI_ISL_406592 | 8091  | T                                | A                                |
| EPI_ISL_406592 | 8455  | T                                | C                                |
| EPI_ISL_406592 | 12597 | T                                | A                                |
| EPI_ISL_406592 | 15636 | T                                | A                                |
| EPI_ISL_406592 | 19269 | C                                | T                                |
| EPI_ISL_406592 | 20315 | T                                | A                                |
| EPI_ISL_406592 | 24947 | G                                | C                                |
| EPI_ISL_406592 | 25347 | A                                | G                                |
| EPI_ISL_406592 | 26108 | A                                | T                                |
| EPI_ISL_406592 | 26141 | A                                | T                                |
| EPI_ISL_406592 | 26754 | GGTGGA                           | GCTGGT                           |
| EPI_ISL_406592 | 28144 | T                                | C                                |
| EPI_ISL_406592 | 29095 | C                                | T                                |
| EPI_ISL_406593 | 8782  | C                                | T                                |
| EPI_ISL_406593 | 28144 | T                                | C                                |
| EPI_ISL_406593 | 29095 | C                                | T                                |
| EPI_ISL_406594 | 27577 | C                                | T                                |
| EPI_ISL_406594 | 28854 | C                                | T                                |
| EPI_ISL_406595 | 709   | G                                | A                                |
| EPI_ISL_406595 | 6846  | T                                | C                                |
| EPI_ISL_406595 | 11707 | A                                | G                                |
| EPI_ISL_406595 | 19959 | A                                | C                                |
| EPI_ISL_406595 | 22621 | GAACAGGAAGAGAATCAGCAACTGTGTTGCTG | GGACAGGAAGAGAATCAGCAACTGTGTTGCTT |
| EPI_ISL_406595 | 23569 | T                                | C                                |

|                |       |             |   |
|----------------|-------|-------------|---|
| EPI_ISL_406595 | 25645 | T           | C |
| EPI_ISL_406595 | 28716 | C           | T |
| EPI_ISL_406596 | 22661 | G           | T |
| EPI_ISL_406596 | 26144 | G           | T |
| EPI_ISL_406597 | 22661 | G           | T |
| EPI_ISL_406597 | 26144 | G           | T |
| EPI_ISL_406798 | 6968  | C           | A |
| EPI_ISL_406798 | 11764 | T           | A |
| EPI_ISL_406801 | 8782  | C           | T |
| EPI_ISL_406801 | 28144 | T           | C |
| EPI_ISL_406844 | 19065 | T           | C |
| EPI_ISL_406844 | 22303 | T           | G |
| EPI_ISL_406844 | 26144 | G           | T |
| EPI_ISL_406844 | 29749 | ACGATCGAGTG | A |
| EPI_ISL_406862 | 241   | C           | T |
| EPI_ISL_406862 | 3037  | C           | T |
| EPI_ISL_406862 | 23403 | A           | G |
| EPI_ISL_406973 | 25060 | A           | G |
| EPI_ISL_407071 | 8782  | C           | T |
| EPI_ISL_407071 | 18488 | T           | C |
| EPI_ISL_407071 | 23605 | T           | G |
| EPI_ISL_407071 | 28144 | T           | C |
| EPI_ISL_407073 | 8782  | C           | T |
| EPI_ISL_407073 | 18488 | T           | C |
| EPI_ISL_407073 | 23605 | T           | G |



|                |       |                           |   |
|----------------|-------|---------------------------|---|
| EPI_ISL_407073 | 28144 | T                         | C |
| EPI_ISL_407073 | 29596 | A                         | G |
| EPI_ISL_407084 | 358   | TGGAGACTCCGTGGAGGAGGTCTTA | T |
| EPI_ISL_407084 | 1912  | C                         | T |
| EPI_ISL_407084 | 18512 | C                         | T |
| EPI_ISL_407193 | 4402  | T                         | C |
| EPI_ISL_407193 | 5062  | G                         | T |
| EPI_ISL_407193 | 8782  | C                         | T |
| EPI_ISL_407193 | 28144 | T                         | C |
| EPI_ISL_407214 | 8782  | C                         | T |
| EPI_ISL_407214 | 18060 | C                         | T |
| EPI_ISL_407214 | 28144 | T                         | C |
| EPI_ISL_407215 | 8782  | C                         | T |
| EPI_ISL_407215 | 18060 | C                         | T |
| EPI_ISL_407215 | 28144 | T                         | C |
| EPI_ISL_407893 | 8782  | C                         | T |
| EPI_ISL_407893 | 28144 | T                         | C |
| MN975262       | 8782  | C                         | T |
| MN975262       | 9561  | C                         | T |
| MN975262       | 15607 | T                         | C |
| MN975262       | 28144 | T                         | C |
| MN975262       | 29095 | C                         | T |
| MN985325       | 8782  | C                         | T |
| MN985325       | 18060 | C                         | T |
| MN985325       | 28144 | T                         | C |

|          |       |                        |                        |
|----------|-------|------------------------|------------------------|
| MN994467 | 1548  | G                      | A                      |
| MN994467 | 8782  | C                      | T                      |
| MN994467 | 24034 | C                      | T                      |
| MN994467 | 26729 | T                      | C                      |
| MN994467 | 28077 | G                      | C                      |
| MN994467 | 28144 | T                      | C                      |
| MN994467 | 28792 | A                      | T                      |
| MN994468 | 17000 | C                      | T                      |
| MN994468 | 26144 | G                      | T                      |
| MN997409 | 8782  | C                      | T                      |
| MN997409 | 11083 | G                      | T                      |
| MN997409 | 28144 | T                      | C                      |
| MN997409 | 29095 | C                      | T                      |
| MT019530 | 103   | CTGCATGCTTAGTGCACTCACG | CAGCATGCCGAGTGCAGCCACA |
| MT019533 | 7866  | G                      | T                      |

The reference genomes we used was Wuhan-Hu-1 (GenBank accession number, NC\_045512.2).

## Reference

- 1 Real-Time RT-PCR Panel for Detection 2019-Novel Coronavirus. CDC 2020;(<https://www.cdc.gov/coronavirus/2019-ncov/lab/rt-pcr-detection-instructions.html#rRT-PCR-assays>).
- 2 Laboratory diagnostics for novel coronavirus. WHO 2020; (<https://www.who.int/health-topics/coronavirus/laboratory-diagnostics-for-novel-coronavirus>).
